1           **Cevipabulin-tubulin complex reveals a novel agent binding site on  $\alpha$ -tubulin**  
2                       **and provides insights into microtubule dynamic instability**

3

4       Jianhong Yang<sup>1\*#</sup>, Yamei Yu<sup>1\*</sup>, Yong Li<sup>1\*</sup>, Haoyu Ye<sup>1\*</sup>, Wei Yan<sup>1</sup>, Lu Niu<sup>1</sup>, Yunhua  
5       Zheng<sup>1</sup>, Zhoufeng Wang<sup>2</sup>, Zhuang Yang<sup>1</sup>, Heying Pei<sup>1</sup>, Haoche Wei<sup>1</sup>, Min Zhao<sup>1</sup>,  
6       Jiaolin Wen<sup>1</sup>, Linyu Yang<sup>1</sup>, Liang Ouyang<sup>1</sup>, Yuquan Wei<sup>1</sup>, Qiang Chen<sup>1</sup>, Weimin Li<sup>2#</sup>,  
7                                               Lijuan Chen<sup>1#</sup>

8

9       <sup>1</sup>State Key Laboratory of Biotherapy and Cancer Center, West China Hospital of Sichuan  
10                                               University, Chengdu 610041, China

11       <sup>2</sup> Department of Respiratory Medicine, West China Hospital, Sichuan University, Chengdu,  
12                                               610041, China

13

14       \*These authors equally contribute to this work

15       #Correspondence should be addressed to L.C. (email: chenlijuan125@163.com) or W.L.  
16       (weimi003@scu.edu.cn) or J.Y. (yjh1988@scu.edu.cn) .

17 **Abstract**

18 Microtubule, composed of  $\alpha\beta$ -tubulin heterodimers, remains as one of the most popular  
19 anticancer targets for decades. To date, anti-microtubule drugs mainly target  $\beta$ -tubulin  
20 to inhibit microtubule dynamic instability (MDI) while agents binding to  $\alpha$ -tubulin are  
21 less well characterized and also the molecular mechanism of MDI is far from being  
22 articulated. Cevipabulin, an oral microtubule-active antitumor clinical candidate, is  
23 widely accepted as a microtubule stabilizing agent (MSA) but binds to the microtubule  
24 -destabilization vinblastine site on  $\beta$ -tubulin and this unusual phenomenon has so far  
25 failed to be explained. Our X-ray crystallography study reveals that, in addition binding  
26 to the vinblastine site, cevipabulin also binds to a novel site on  $\alpha$ -tubulin (named the  
27 seventh site) which located at the region spatially corresponding to the vinblastine site  
28 on  $\beta$ -tubulin. Interestingly, cevipabulin exhibits two unique site-dependent functions.  
29 Cevipabulin binding to the seventh site promotes tubulin degradation through  
30 interaction of the non-exchangeable GTP to reduce tubulin stability. Cevipabulin  
31 binding to the vinblastine site enhances longitudinal interactions but inhibits lateral  
32 interactions of tubulins, thus inducing tubulin protofilament polymerization (but not  
33 microtubule polymerization like MSAs), and then tangling into irregular tubulin  
34 aggregates. Importantly, the tubulin-cevipabulin structure is an intermediate between  
35 “bent” and “straight” tubulins and the involved bent-to-straight conformation change  
36 will be helpful to fully understand the molecular mechanism of tubulin assembly. Our  
37 findings confirm cevipabulin is not an MSA and shed light on the development of a  
38 new generation of anti-microtubule drugs targeting the novel site on  $\alpha$ -tubulin and also

39 provide new insights into MDI.

40

41 **Key words**

42 Cevipabulin; Tubulin Inhibitor; Microtubule Dynamic Instability; Novel Binding Site;

43 Tubulin Degradation.

44

45 **Introduction**

46 Microtubules play key roles in many important cell events, especially cell division, and  
47 thus remain as one of the most popular anticancer targets for decades [1, 2].

48 Microtubules are composed of  $\alpha\beta$ -tubulin heterodimers assembled into linear  
49 protofilaments and their packaging demands both lateral and longitudinal interactions  
50 between tubulins [3]. To date, various tubulin inhibitors have been reported to alter the

51 lateral and/or longitudinal interactions to promote microtubule assembly or disassembly,

52 including the clinical most popular anticancer drugs: vinca alkaloids, taxanes, eribulin  
53 *et al* [4, 5]. These drugs all target  $\beta$ -tubulin, which has five different binding sites

54 (colchicine, vinblastine, paclitaxel, laulimalide and maytansine sites) [5]. By

55 overexpression of  $\beta$ -tubulin isoforms, especially  $\beta$ III-tubulin, cancer cells are prone to

56 become resistant to these therapies [6]. So far, the pironetin site is the only one located

57 on  $\alpha$ -tubulin [5, 7]. However, this site is too small and pironetin has six chiral centers

58 in its molecular structure, making it difficult to be synthesized. Since the crystal

59 structure of tubulin-pironetin was reported in 2016 [5, 7], no significant progress has

60 been made in the design of pironetin-binding-site inhibitors or even analogues of

61 pironetin.

62 Microtubule dynamic instability (MDI) is referred to the random switching between  
63 microtubule regrowth and shrinkage, which accompanied by periodic cycles of “bent”  
64 to “straight” conformation change in tubulin protofilament [8]. However, the detailed  
65 molecular mechanism of bent-to-straight conformation transition is unclear. Structural  
66 study of complexes of tubulin with the six known binding-site inhibitors allows in detail  
67 description of how inhibitors bind to and change the conformation of tubulin to alter  
68 MDI [3, 5, 9-12]. For example, inhibitors binding to paclitaxel or laulimalide site, the  
69 only two microtubule stabilization agents (MSAs) sites [13], stabilize the M-loop on  $\beta$ -  
70 tubulin to enhance lateral interactions to promote tubulin polymerization [9, 11],  
71 revealing a structuring of the M-loop into a short helix during tubulin polymerization  
72 [11]; Inhibitors binding to colchicine site, a widely known microtubule destabilization  
73 agents (MDAs) site [12], bind to the intra-dimer interfaces to inhibit flipping in of T7  
74 loop on  $\beta$ -tubulin to inhibit tubulin polymerization [12, 14], thus demonstrating a  
75 flipping in and out of the T7 loop participating in MDI [14]. With the current existing  
76 tubulin-inhibitors complexes, some of the local conformation changes of MDI are  
77 easily observed. However, due to the lack of an intermediate structure between “bent”  
78 and “straight” of tubulin, the most important “bent” to “straight” conformation change  
79 has never been detailly described and the underlying molecular mechanism remains  
80 elusive.

81 Cevipabulin (or TTI-237) is a synthetic tubulin inhibitor with *in vivo* anticancer  
82 activity and has been used in clinical trials investigating the treatment of advanced

83 malignant solid tumors [15]. Competition experiment showed it competed with <sup>3</sup>H-  
84 vinblastine but not <sup>3</sup>H-paclitaxel for binding to microtubules, indicating it binds to the  
85 classic tubulin-depolymerization vinblastine site [16]. However, an *in vitro* tubulin  
86 polymerization assay exhibited that cevipabulin did not inhibit tubulin polymerization  
87 as vinblastine but promoted tubulin polymerization as paclitaxel [16]. These studies  
88 concluded that cevipabulin seems displaying mixed properties between paclitaxel and  
89 vinblastine. More recently, Kovalevich *et al.* identified two unusual characters of  
90 cevipabulin. Cevipabulin could promote tubulin degradation and induce lots of tubulin  
91 aggregates in cell cytoplasm which have never observed in reported known tubulin  
92 inhibitors[17]. Despite extensive efforts, the unusual phenomenon and characters of  
93 cevipabulin have so far failed to be explained and the underlying mechanism of action  
94 on microtubule has not been clearly defined [16, 18-21]. Recently, Gonzalo *et al.*  
95 synthesized an analogue of cevipabulin (named compound **2** in this paper) and got the  
96 crystal structure of tubulin-compound **2** complex (PDB code: 5NJH) and prove  
97 compound **2** binds to the vinblastine site of  $\beta$ -tubulin to enhance longitudinal  
98 interactions and induced formation of tubulin bundles in cell, which seems like that  
99 compound **2** binding to vinblastine site could really induce tubulin polymerization in a  
100 paclitaxel-like manner[18]. However, they didn't observe compound **2** induced  
101 microtubule through transmission electron microscope (TEM) *in vitro*, which makes  
102 their conclusion not rigorous enough.

103 In this study, we solved the crystal structure of tubulin-cevipabulin complex and were  
104 surprised to find that cevipabulin simultaneously binds to two spatially independent

105 sites: the vinblastine site and a new site on  $\alpha$ -tubulin (called the seventh site). Detailed  
106 mechanism revealed that cevipabulin binding to the two sites exhibited two different  
107 and independent function: binding to the seventh site induces tubulin degradation and  
108 binding to vinblastine site leads to tubulin protofilament polymerization and then  
109 formation of irregular tubulin aggregates. Our study reveals that the increase in turbidity  
110 caused by cevipabulin is not the consequence of microtubule polymerization but the  
111 results of protofilament polymerization of tubulin, which well explains its paclitaxel  
112 like phenomenon but undefined function previously. Structure-activity-relationship  
113 demonstrate that trifluoropropanyl of cevipabulin plays a critical role in binding to the  
114 seventh site. Our study reveals a novel binding site on  $\alpha$ -tubulin related to tubulin  
115 degradation effect and lays a foundation for the rational design of new generation of  
116 anticancer drugs. Importantly, we define a novel tubulin inhibition mechanism:  
117 enhancing longitudinal and inhibiting lateral interactions to induce formation of  
118 irregular tubulin aggregates and the involved bent-to-straight conformation change  
119 provides new insights into MDI.

## 120 **Results**

121 *Cevipabulin induces tubulin degradation and formation of irregular tubulin aggregates*

122 To elucidate the cellular effect of cevipabulin at an early time point, we carried out  
123 label-free quantitative proteomic analysis on six-hour cevipabulin treated human  
124 cervical adenocarcinoma cell line-HeLa. Cevipabulin significantly down-regulated the  
125 protein level of  $\alpha$ ,  $\beta$ -tubulin and their isoforms with high selectivity (Fig.1a).  
126 Immunoblotting study confirmed cevipabulin decreased tubulin proteins in HeLa,

127 human colon colorectal carcinoma cell line Hct116, human large cell lung carcinoma  
128 cell line H460 and human B cell lymphoma cell SU-DHL-6 in a dose-dependent manner  
129 (Fig.1b) and time dependent manner in HeLa cells (Fig. S1a), demonstrating that the  
130 reduction of tubulin is a common biochemical consequence of cevipabulin treatment in  
131 cancer cells. The quantitative PCR assay showed that cevipabulin had no effect on  $\alpha$ -  
132 and  $\beta$ -tubulin mRNA levels (Fig.S1b), indicating that the downregulation of tubulin  
133 protein by cevipabulin is post-transcriptional. MG132, a proteasome inhibitor, could  
134 completely block cevipabulin-induced tubulin degradation (Fig.S1c). All these proved  
135 that cevipabulin promoted tubulin degradation in a proteasome dependent pathway.

136 Immunofluorescence staining of tubulin is commonly used to detect microtubule  
137 morphology in cells treated with tubulin inhibitors [22]. Untreated cells presented  
138 normal microtubule network in cells (Fig.1c). MSAs, such as paclitaxel, induced  
139 excessive tubulin polymerization and presented bunches of microtubules in cells  
140 (Fig.1d). MDAs, such as colchicine, inhibited tubulin polymerization and completely  
141 destroyed microtubules (Fig.1e). Vinblastine, another MDA, inhibited tubulin  
142 polymerization at low concentration (the same as colchicine, Fig. 1f), but induced the  
143 formation of tubulin paracrystals in the cytoplasm at high concentration (Fig. 1g),  
144 which was considered as packing of spiral protofilaments [3]. Interestingly, in cells  
145 treated with cevipabulin we observed a large number of irregular tubulin aggregates  
146 formation throughout the cytoplasm (Fig.1h), which was totally different from  
147 traditional MSAs and MDAs.

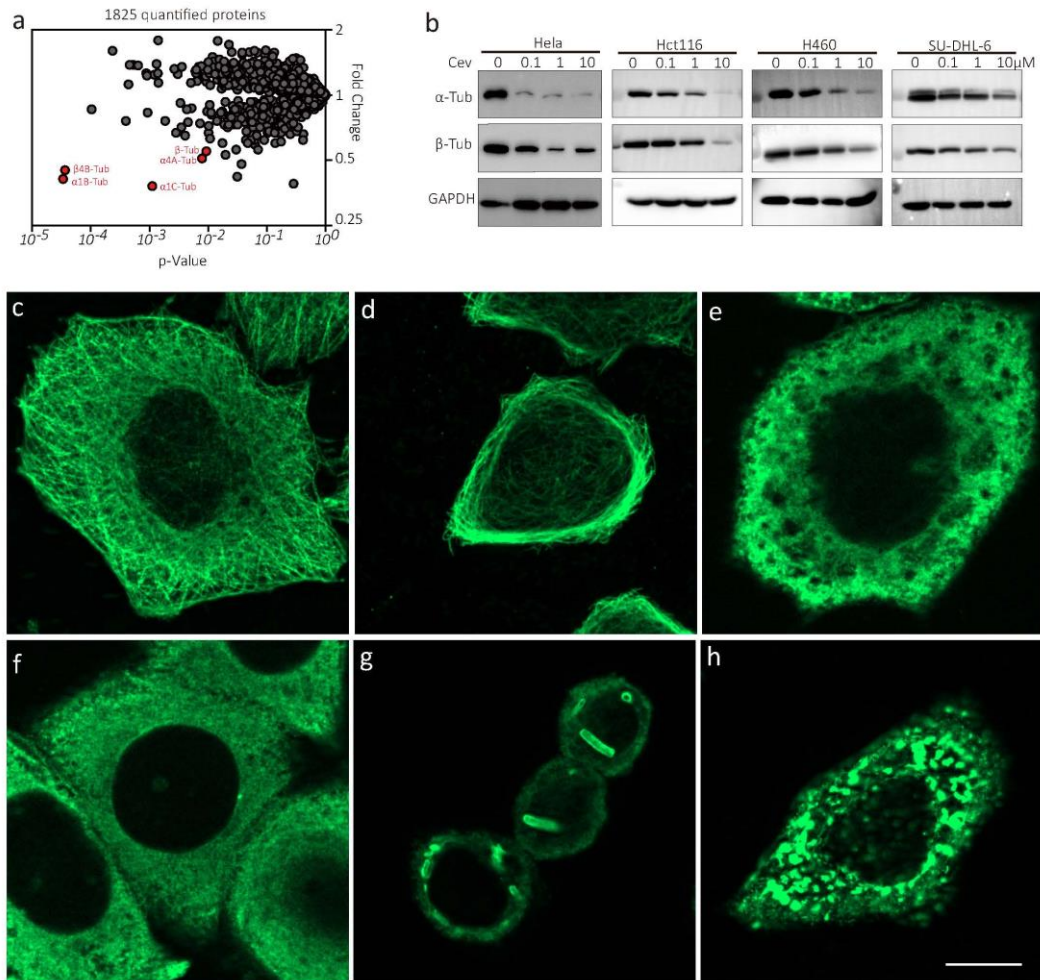

148  
149 **Figure 1. Cevipabulin promotes  $\alpha$ - and  $\beta$ -tubulin degradation and induces the formation of**  
150 **irregular tubulin aggregates. (a)** Label-free quantitative proteomic analysis of total proteins from  
151 HeLa cells treated with 1  $\mu$ M cevipabulin for 6 h. This graph presents fold-changes of 1825  
152 quantified proteins between cevipabulin and DMSO treatment groups versus the p value (t test;  
153 triplicate analysis). Three biological repetitions are performed. (b) Immunoblotting analysis of both  
154  $\alpha$  and  $\beta$ -tubulin levels in HeLa, Hct116, H460 and SU-DHL-6 cells, which all are treated with  
155 indicated concentrations of cevipabulin for 16 h. Results are representative of three independent  
156 experiments. (c-h) HeLa cells are treated with (c) DMSO, (d) paclitaxel (1  $\mu$ M), (e) colchicine (1  
157  $\mu$ M), (f) vinblastine (1  $\mu$ M), (g) vinblastine (10  $\mu$ M) and (h) cevipabulin (3  $\mu$ M) for 1 hour and  
158 then subjected for immunofluorescence analysis with  $\alpha$ -tubulin antibody to monitor morphology of  
159 microtubule. Bar=10 $\mu$ m. Results are representative of three independent experiments. Cev:  
160 cevipabulin.

161

162 *Crystal structure of tubulin-cevipabulin reveals its simultaneously binding to the*  
163 *vinblastine site and a novel site on  $\alpha$ -tubulin*

164 To analyze the binding details of cevipabulin (Fig. 2a) to tubulin, we soaked cevipabulin



165 into the crystals consisting of two tubulin heterodimers, one stathmin-like protein RB3  
166 and one tubulin tyrosine ligase (T2R-TTL) [11]. The crystal structure of tubulin-  
167 cevipabulin complex was determined to be 2.6 Å resolution (Table S1). The whole  
168 structure was identical to previously reported [11], two tubulin heterodimers were  
169 arranged in a head to tail manner ( $\alpha 1\beta 1$ - $\alpha 2\beta 2$ ) with the long helix RB3 comprising both  
170 dimers and tubulin tyrosine ligase docking onto  $\alpha 1$ -tubulin (Fig. 2b). The Fo–Fc  
171 difference electron density unambiguously revealed two cevipabulin molecules binding  
172 to two different sites (Fig. 2c and 2d): one at the inter-dimer interfaces between the  $\beta 1$ -  
173 and  $\alpha 2$ -tubulin subunits (the vinblastine site) and the other one at the intra-dimer  
174 interfaces between  $\alpha 2$ - and  $\beta 2$ -tubulin subunits (Fig. 2b) and the later binding region is  
175 a new binding site (here named as the seventh site).

176 The binding region of cevipabulin in the vinblastine site was formed by residues from  
177  $\beta H6$ ,  $\beta H7$ ,  $\beta T5$  loop,  $\alpha H10$  and  $\alpha T7$  loop (Fig.2e). As presented in Figure 2f, the side  
178 chain of  $\beta Y224$  made  $\pi$ - $\pi$  stacking interactions with triazolopyrimidinyl group of  
179 cevipabulin and the guanine nucleobase of GDP (Fig.2f). Seven hydrogen bonds (N1  
180 atom to side chain of  $\beta Y224$ ; N3 atom to main-chain nitrogen of  $\beta Y224$  through a water;  
181 N4 atom to main-chain nitrogen of  $\beta Y224$ ; 5- chlorine atom to both main-chain nitrogen  
182 of  $\beta Y224$  and  $\beta T223$ ; 2'- fluorine atom to site chain of  $\beta Y224$  and main-chain nitrogen  
183 of  $\beta N206$ ) between cevipabulin and  $\beta 1$ -tubulin were observed. The -NH- group on the  
184 cevipabulin side chain formed a salt bridge with  $\beta D211$ . Besides, cevipabulin also  
185 exhibited four hydrogen bonds with  $\alpha 2$ -tubulin (oxygen atom on side chain to the side  
186 chain of  $\alpha N329$ ; 2'- fluorine atom to the main-chain nitrogen of  $\alpha N326$ ; one fluorine

187 atom of trifluoropropanyl to both main and side chain of  $\alpha$ N326) (Fig.2g).

188 The seventh site on  $\alpha$ 2-tubulin is formed by residues from  $\alpha$ H1,  $\alpha$ H6,  $\alpha$ H7,  $\alpha$ T5,  $\beta$ H10

189 and  $\beta$ T7 (Fig.2h). Similar to the vinblastine site, triazolopyrimidinyl of cevipabulin at

190 this site also made  $\pi$ - $\pi$  stacking interactions with the side chain of  $\alpha$ Y224 and the

191 guanine nucleobase of GTP (Fig. 2i). There were eight hydrogen bonds (N1 atom to

192 side chain of  $\alpha$ Y224; N4 atom to main-chain nitrogen of  $\alpha$ Y224; 5- chlorine atom to

193 main-chain nitrogen of  $\alpha$ T223; 2'- fluorine atom to site chain of  $\alpha$ N206; 6'- fluorine

194 atom to site chain of  $\alpha$ R221; One fluorine atom of trifluoropropanyl to side chain of

195  $\alpha$ N206; Another fluorine atom of trifluoropropanyl to both O2' AND O3' of GTP )

196 between cevipabulin and  $\alpha$ 2-tubulin and a salt bridge between the -NH- group of

197 cevipabulin side chain and  $\alpha$ D211 (Fig. 2i). Notably, there is no hydrogen bond between

198 cevipabulin and  $\beta$ 2-tubulin at this new site.

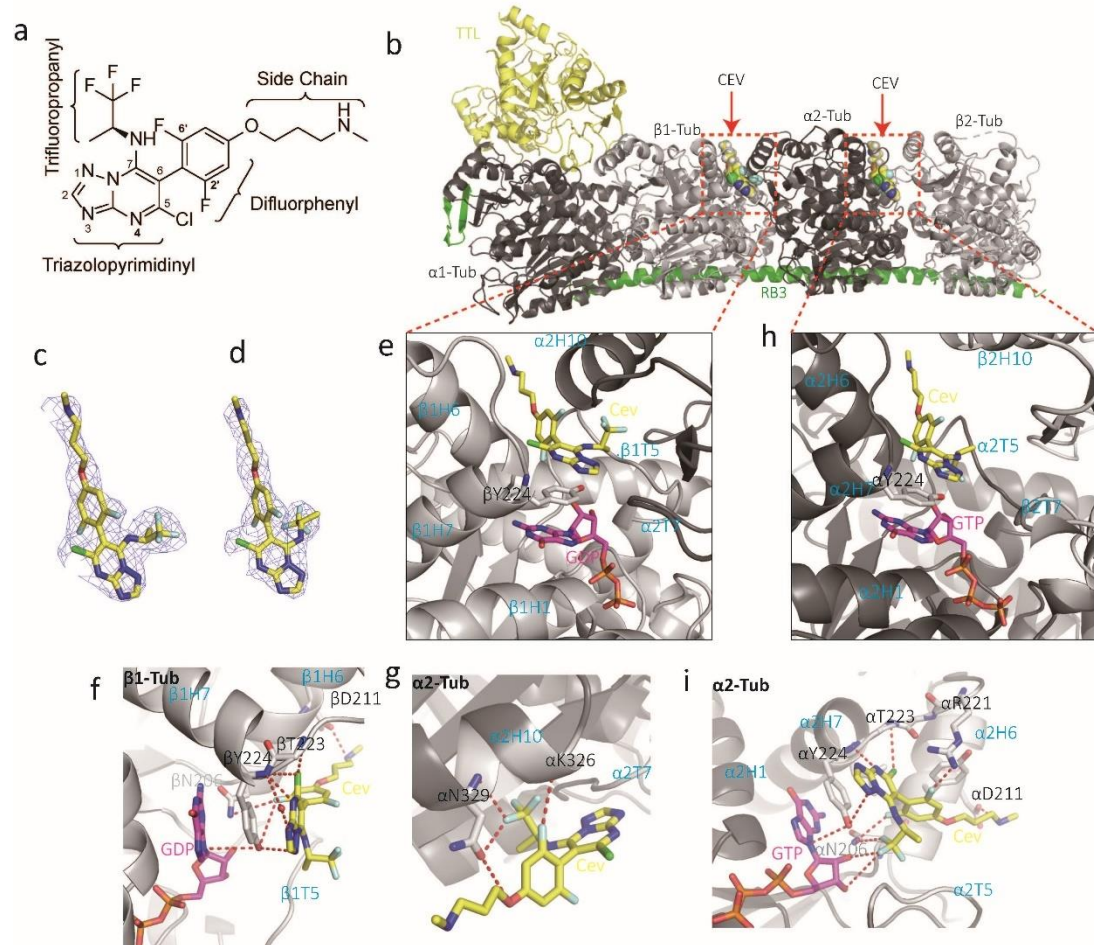

199

200 **Figure 2. Crystal structure of tubulin-cevipabulin complex.** (a) Chemical structure of  
 201 cevipabulin. (b) Overall structure of tubulin-cevipabulin complex. TTL is colored yellow, RB3 is  
 202 green,  $\alpha$ -tubulin is dark and  $\beta$ -tubulin is grey. Cevipabulin on  $\beta$ 1-tubulin and  $\alpha$ 2-tubulin are all shown  
 203 in spheres and colored yellow. (c, d) Electron densities of cevipabulins on (c)  $\beta$ 1-tubulin or (d)  $\alpha$ 2-  
 204 tubulin. The  $F_o - F_c$  omit map is colored light blue and contoured at  $3\delta$ . (e, f) Close-up view of  
 205 cevipabulin binding to (e)  $\beta$ 1-tubulin or (f)  $\alpha$ 2-tubulin. GDP or GTP is shown in magenta sticks.  
 206 Cevipabulin is shown in yellow sticks. Side chain of  $\beta$ 1-Y224 or  $\alpha$ 2-Y224 is shown in grey sticks.  
 207 (g, h) Interactions between (g)  $\beta$ 1-tubulin and vinblastine-site cevipabulin or (h)  $\alpha$ 2-tubulin and  
 208 vinblastine-site cevipabulin. Coloring is the same as in (e). Residues from tubulin that form  
 209 interactions with vinblastine-site cevipabulin are shown as sticks and labeled. Hydrogen bonds are  
 210 drawn with red dashed lines. (i) Interactions between  $\alpha$ 2-tubulin and the-seventh-site cevipabulin,  
 211 color is the same as in (f), residues from tubulin that form interactions with the-seventh-site  
 212 cevipabulin are shown as sticks and are labeled. Hydrogen bonds are drawn with red dashed lines.  
 213 Cev: cevipabulin.

214

215 *Cevipabulin binding to vinblastine site induces the formation of irregular tubulin*  
 216 *aggregates while binding to the seventh site induces tubulin degradation*

217 To address the functions of these two sites, we used vinblastine to block the vinblastine

218 site or single amino acid substitution (Y224G on  $\alpha$ -tubulin) to block the seventh site.  
219 When vinblastine site was occupied, cevipabulin lost its ability to induce irregular  
220 tubulin aggregation, while retaining the tubulin-degradation effect (Fig. 3a and 3b).  
221 When the seventh site was mutant, cevipabulin lost the tubulin-degradation effect but  
222 persist inducing irregular tubulin aggregation (Fig. 3c and 3d). These data indicate that  
223 cevipabulin binds to the vinblastine site inducing irregular tubulin aggregation, while  
224 binds to the seventh site led to tubulin degradation.

225 To independently study the functions and structure activity relationship between these  
226 two sites, we employed two reported cevipabulin analogues (compounds **1** [17] and **2**  
227 [18]) for further study (Fig. 3e), which only bound to the seventh site or the vinblastine  
228 site, respectively. Compared with cevipabulin, compound **1** lacks the N- substituted side  
229 chain. Further, the trifluoropropanyl in compound **1** was replaced by an azabicyclo to  
230 obtain compound **2**. We found compound **1** only induced tubulin degradation (Fig. 3f)  
231 and did not lead to irregular tubulin aggregation (Fig. 3g), in contrast, compound **2** only  
232 induced irregular tubulin aggregation but not tubulin degradation (Figs. 3f, 3g).  
233 Competition assay indicated that  $\alpha$ Y224G mutation, but neither vinblastine nor  
234 compound **2**, inhibited compound **1** induced tubulin degradation (Fig. 3h, S2a and S3b).  
235 Vinblastine, rather than compound **1** or  $\alpha$ Y224G mutation, suppressed compound **2**  
236 caused irregular tubulin aggregation (Fig. 3i, S2c and S2d). These results demonstrated  
237 that compound **1** only bond to the seventh site while compound **2** only bound to the  
238 vinblastine site, and also implied that trifluoropropanyl of cevipabulin played critical  
239 role in binding to the seventh site.

240

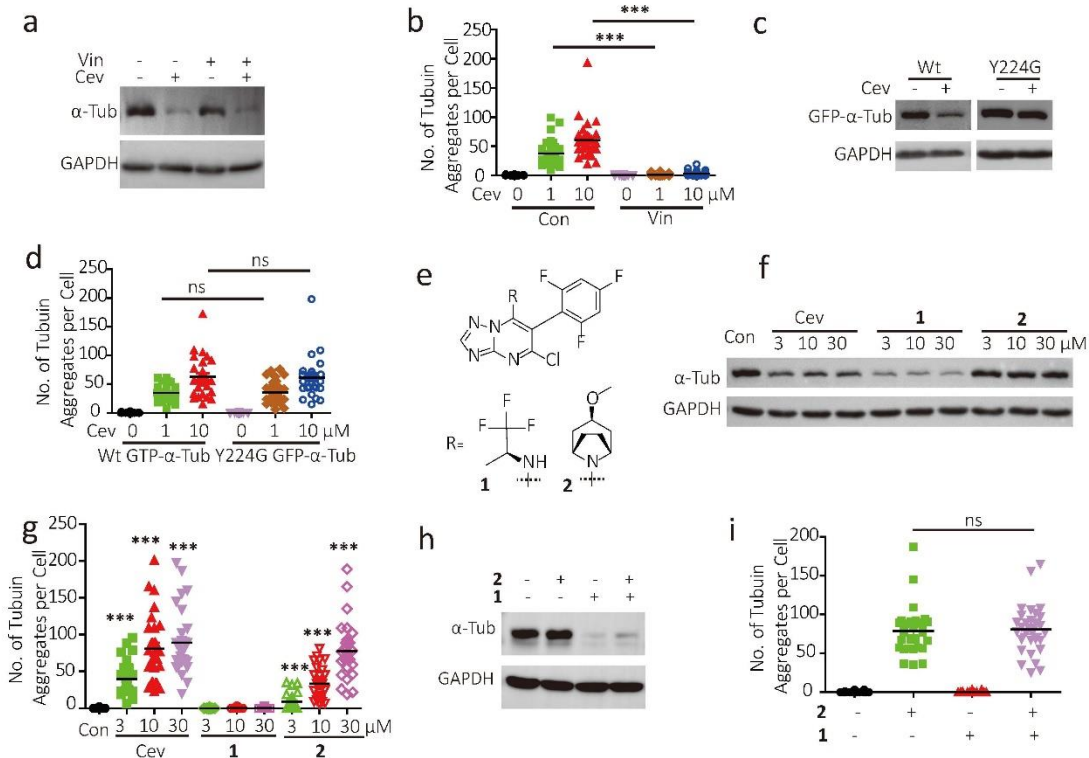

241

242

243

244

245

246

247

248

249

250

251

252

253

254

255

256

257

258

259

260

261

262

263

264

**Figure 3. Cevipabulin binds to vinblastine site to induce formation of irregular tubulin aggregates while binds to the seventh site to induce tubulin degradation.** (a) HeLa cells were treated with 10  $\mu$ M vinblastine for 1 h and then further treated with 1  $\mu$ M cevipabulin for 16 h. The  $\alpha$ -tubulin protein level was detected by immunoblotting. Results are representative of three independent experiments. (b) HeLa cells treated with or without 10  $\mu$ M vinblastine for 1 h before treated with 1  $\mu$ M or 10  $\mu$ M cevipabulin for another hour. Irregular tubulin aggregates were detected using immunofluorescence and the number of irregular tubulin aggregates was counted for randomly chosen 30 cells. \*\*\* $p$ <0.00001. Results are representative of three independent experiments. (c) Vectors expressing either wild type or Y224G mutant GFP-tubulin were transfected to HeLa cells. After 24 hours, cells were treated with or without 1  $\mu$ M cevipabulin for 16 h. Then the protein level of GFP- $\alpha$ -tubulin was detected by immunoblotting. Results are representative of three independent experiments. (d) Vectors expressing either wild type or Y224G mutant GFP- $\alpha$ -tubulin were transfected to HeLa cells. After 24 hours, cells were treated with or without 1  $\mu$ M cevipabulin for 1 h. Irregular tubulin aggregates were detected using immunofluorescence and the number of irregular tubulin aggregates was counted for randomly chosen 30 cells. ns: no significant difference. Results are representative of three independent experiments. (e) Chemical structure of cevipabulin derivatives. (f) HeLa cells were treated with indicated compounds for 16 h. Then the protein level of  $\alpha$ -tubulin was detected by immunoblotting. Results are representative of three independent experiments. (g) HeLa cells were treated with indicated compounds for 1 h and irregular tubulin aggregates were detected using immunofluorescence and the number of irregular tubulin aggregates was counted for randomly chosen 30 cells. ns. no significant difference. \*\*\* $p$ <0.0001 in comparison with the control. Results are representative of three independent experiments. (h) HeLa cells were treated with or without 30  $\mu$ M compound 2 for 1 hour before treated with 10  $\mu$ M compound 1 for

265 16 h and then the protein level of  $\alpha$ -tubulin was detected by immunoblotting. Results are  
266 representative of three independent experiments. (i) HeLa cells were treated with or without 30  $\mu$ M  
267 compound **1** for 1 hour before treated with 10  $\mu$ M compound **2** for another hour. The irregular  
268 tubulin aggregates were detected by immunofluorescence and the number of irregular tubulin  
269 aggregates was counted for randomly chosen 30 cells. ns. no significant difference. Results are  
270 representative of three independent experiments. Cev: cevipabulin. **1**: compound **1**; **2**: compound **2**;  
271 Vin: vinblastine.

272

273 *Compound 2 promotes protofilaments polymerization by enhancing longitudinal and*  
274 *inhibiting lateral interactions of tubulins*

275 Gonzalo *et al.* reported the crystal structure of tubulin-compound **2** complex (PDB code:  
276 5NJH) and revealed compound **2** bound to the vinblastine site can to enhance  
277 longitudinal interactions and induce the formation of tubulin bundles in cells. It seems  
278 that the binding of compound **2** to vinblastine site could induce tubulin polymerization  
279 in a paclitaxel-like manner [18]. Here we further and detailly investigated its effect on  
280 tubulin in cells. Immunofluorescence study showed that compound **2** induced short  
281 tubulin bundles (seems like microtubule bundles) formation at low concentrations (3  
282  $\mu$ M) for 1 hour treatment (Fig. 4b), which was in consistent with the published data  
283 [18]. However, when the concentration of compound **2** was increased to 10  $\mu$ M, some  
284 of the tubulin bundles turned into tubulin aggregates (Fig. 4c). At higher concentration  
285 of 30  $\mu$ M, the whole cytoplasm was all filled with irregular tubulin aggregates, and no  
286 tubulin bundles were observed (fig.4d), which was the same as cevipabulin treatment.  
287 Interestingly, as cells treated with 3  $\mu$ M compound **2** for longer time (4h or 8h), the  
288 short tubulin bundles will also turn into irregular tubulin aggregates (Fig. 4e and 4f).  
289 To further investigate this unusual characteristic, we treated purified tubulin with  
290 compound **2** and then analyzed with TEM. As presented in Figure 4g, compound **2**

291 induced numbers of linear structure formation, which entangled each other to form a  
292 bundle of tubulin or tubulin aggregates. The diameter of the thinnest linear structure  
293 was about 6~7 nm (Fig. 4h), which was much smaller than that of microtubule (Fig.  
294 s3a), but perfectly matched the diameter of tubulin protofilament. These results  
295 indicated that compound **2** induced tubulin polymerizing into tubulin protofilament, but  
296 not microtubule as previously suggested [18]. Thus, it is reasonable to assume that the  
297 unusual irregular tubulin aggregates caused by compound **2** observed in cell cytoplasm  
298 are the consequence of randomly stacking and aggregation of tubulin protofilaments.

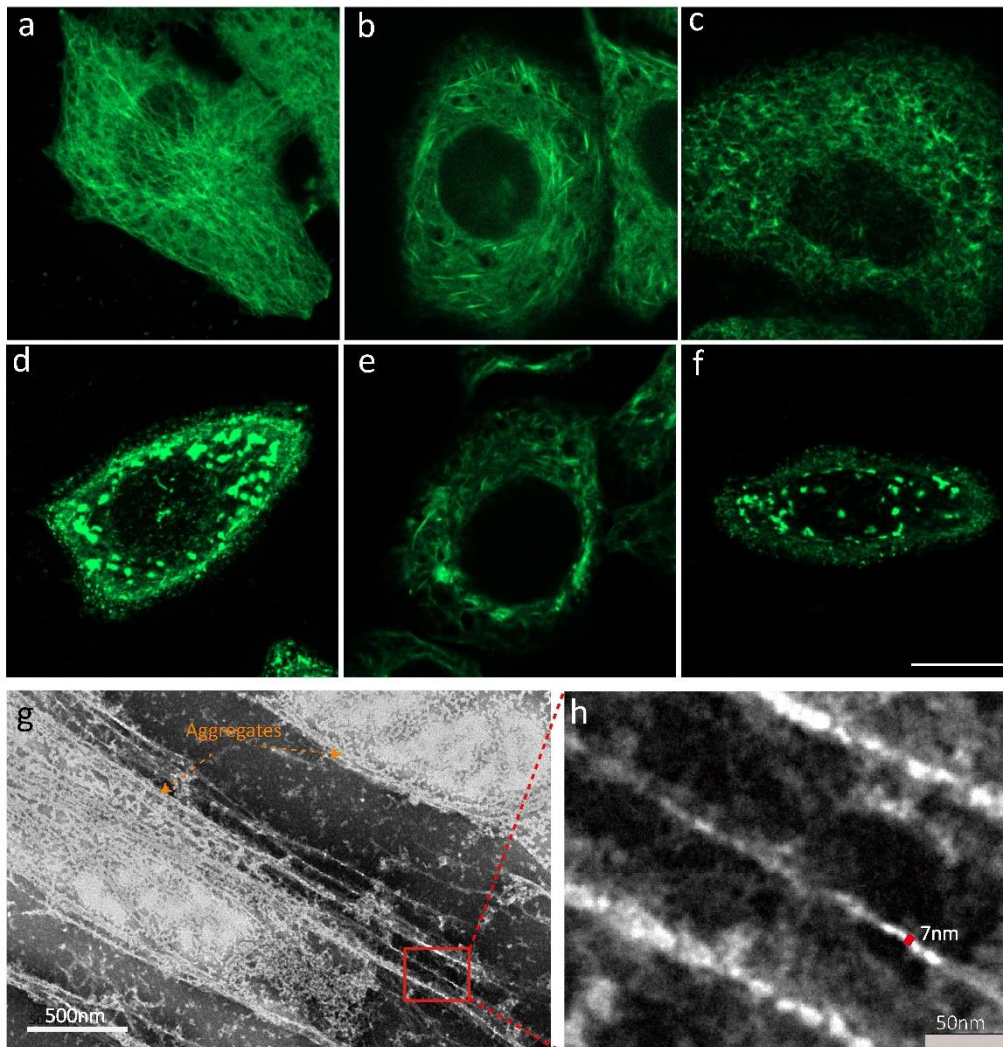

299  
300 **Figure 4. Compound 2 induced tubulin protofilaments polymerization. (a-f)** HeLa Cells treated  
301 with (a) 0, (b) 3, (c) 10 or (d) 30 μM compound **2** for 1 hour or treated with 3 μM compound **2** for

302 (e) 4 or (f) 8 h. Cells were then subjected for immunofluorescence analysis with  $\alpha$ -tubulin  
303 antibody to monitor the morphology of microtubule. Bar=10 $\mu$ m. Results are representative of  
304 three independent experiments. (g, h) Purified tubulin (2mg/ml was incubated with 50  $\mu$ M  
305 compound **2** for 30min at room temperature before imaged with TEM. Results are representative  
306 of three independent experiments. Both large tubulin protofilaments aggregation (g) and single  
307 tubulin protofilament (h) were observed. Results are representative of three independent  
308 experiments.

309

310 Crystal structures of tubulin-compound **2** (PDB code: 5NJH) and tubulin-cevipabulin  
311 could be superimposed very well in whole (Fig S3b, with a root-mean-square deviation  
312 (RMSD) of 0.45 Å over 1,930 C $\alpha$  atoms) or in their binding region (Fig S3c). Hence,  
313 we used the tubulin-compound **2** structure for structural mechanism analysis. We  
314 superimposed the  $\beta$ 1-tubulin subunit of tubulin-compound **2** to the one of the apo-  
315 tubulin structure (PDB code: 4I55). In the inter-dimer interfaces, compound **2** led to a  
316 6.7 Å shift of the  $\alpha$ H10 helix of  $\alpha$ 2-tubulin towards  $\beta$ 1-tubulin (Fig. S3d), and thus the  
317 conformation of tubulin-compound **2** complex was arranged in a more “straight”  
318 manner than that of apo tubulin complex (Fig. S3e), implying compound **2** enhanced  
319 longitudinal interactions of tubulin dimers. We then superimposed tubulin-compound **2**  
320 complex to a polymerized microtubule structure (PDB code: 6DPV). The individual  
321  $\beta$ 1-tubulin or  $\alpha$ 2-tubulin in tubulin-compound **2** complex align better than those in apo  
322 tubulin structure to the corresponding subunits in polymerized microtubule structure  
323 (RMSD: 0.895 Å and 0.830 Å for  $\beta$ 1-tubulin and  $\alpha$ 2-tubulin in tubulin-Compound **2**  
324 complex, respectively; 1.392 Å and 1.261 Å for  $\beta$ 1-tubulin and  $\alpha$ 2-tubulin in apo  
325 tubulin, respectively), suggesting compound **2** caused both  $\beta$ 1-tubulin or  $\alpha$ 2-tubulin to  
326 take a more “polymerized” state. Focusing on the interface of  $\beta$ 1-tubulin and  $\alpha$ 2-tubulin,  
327 compound **2** binding caused significant movement of  $\alpha$ T7,  $\alpha$ H8 and  $\alpha$ H10 to from a



328 depolymerized-to-polymerized state transformation (Fig. 5a and 5b). We noticed that  
329 in tubulin-compound **2** complex, the T5 loop on  $\alpha$ 2-tubulin in the intra-dimer interface  
330 showed an obvious shift from depolymerized to polymerized state (Fig.5c). As there is  
331 no ligand binding to the intra-dimer interface in the tubulin-compound **2** complex, the  
332  $\alpha$ T5 loop outward shift might be allosterically mediated by the inter-dimer interface  
333 conformation change. We infer that the more compact intra-dimer interface induced by  
334 compound **2** can make tubulin prone to form a straight dimer like that in the  
335 polymerized microtubule (Fig.5d), and thus straighten tubulin protofilaments.  
336 Therefore, we uncovered a continuous conformational change which could mimic the  
337 bent-to-straight conformation change during tubulin polymerization. With compound **2**  
338 binding as a small wedge, these straight protofilaments still has a  $4.2^\circ$  curvature at the  
339 inter-dimer interface (Fig. 5e). Also, we could clearly observe a clash between  $\alpha$ H10 in  
340 polymerized microtubule structure and compound **2** (Fig. S3f), suggesting compound  
341 **2** binding obstructs the straight conformation of tubulins. This is in line with the fact  
342 that compound **2** can not be incorporated into polymerized microtubule [18]. To analyze  
343 the lateral interaction, we aligned tubulin-compound **2** complexes to two adjacent  
344 protofilaments in polymerized microtubule structure based on  $\beta$ 1-tubulin. The M-loop,  
345 which is important for lateral interaction, exhibited a 5.4 Å shift between tubulin-  
346 compound **2** complex and polymerized microtubule (Fig. S3g), suggesting the M-loop  
347 is in a polymerization unfavored status. Thus, we revealed for the first time that  
348 cevipabulin or compound **2** enhanced tubulin longitudinal interactions while inhibited  
349 lateral interactions to induce excessive polymerization of tubulin protofilaments

350 (Fig.5f). Our results also confirm that cevipabulin is not an MSA as previously reported.

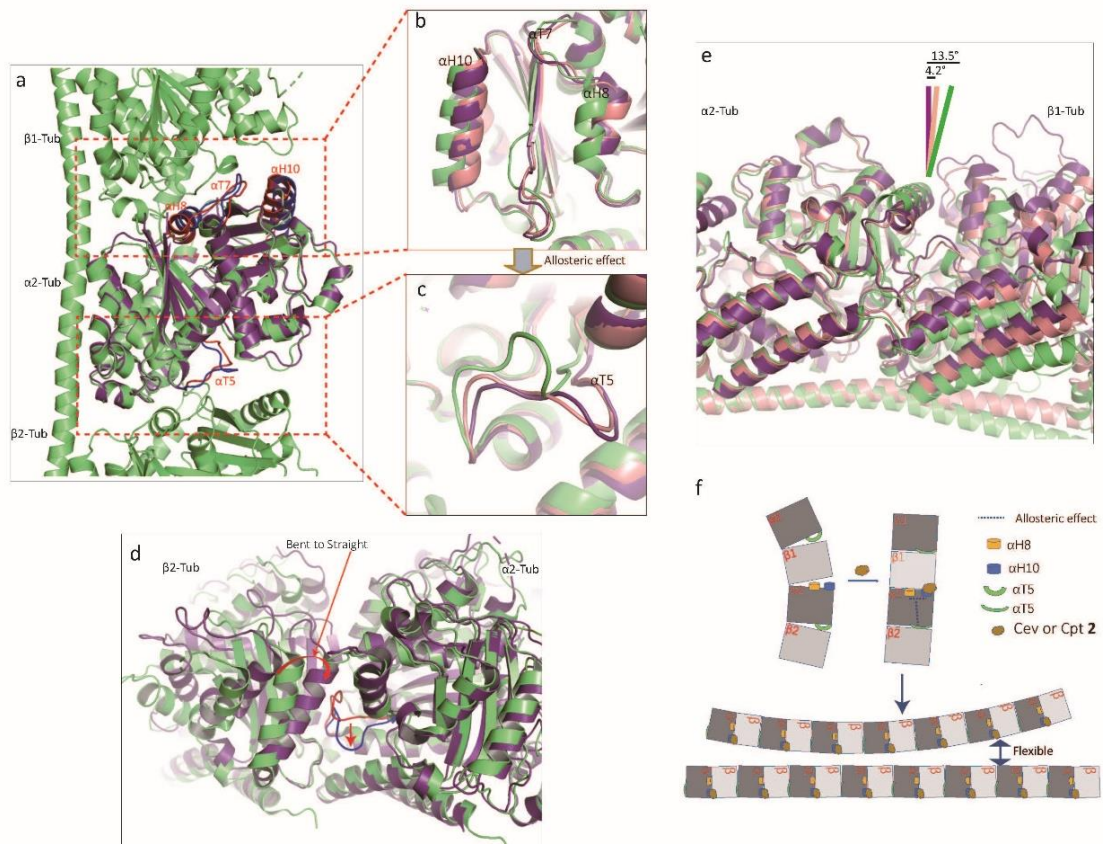

351  
 352 **Figure 5. Structural mechanism of cevipabulin and compound 2 induced tubulin**  
 353 **protofilaments polymerization.** (a) Overview of the aligned structures of apo tubulin (PDB code:  
 354 4I55) and a polymerized microtubule (PDB code: 6DPV). The crystal structures of apo tubulin  
 355 (green) and the polymerized microtubule (violetpurple) are superimposed on  $\alpha 2$ -tubulin subunits.  
 356  $\beta 1$ ,  $\alpha 2$  and  $\beta 2$ -tubulin subunits of apo tubulin structure are shown while only  $\alpha 2$ -tubulin subunit the  
 357 polymerized microtubule structure is shown.  $\alpha H10$ ,  $\alpha H8$ ,  $\alpha T7$  and  $\alpha T5$  are colored blue in apo  
 358 tubulin structure while red in the polymerized microtubule structure. (b) Tubulin-compound 2  
 359 (salmon, PDB code: 5NJH) is aligned to the superimposed complexes in (a) based on  $\alpha 2$ -tubulin  
 360 subunit. Close-up view of the  $\beta 1$ - $\alpha 2$ -tubulin inter-dimer interface reveals that  $\alpha H10$  and  $\alpha H8$  in  
 361 tubulin- compound 2 have a significant movement from a “depolymerized” (apo tubulin) state to a  
 362 “polymerized” (polymerized microtubule structure) state. (c) Close-up view of the  $\alpha 2$ - $\beta 2$  intra-  
 363 dimer interface. The  $\alpha T5$  loop in tubulin-compound 2 has an outward shift to match the  $\alpha T5$  loop  
 364 in the polymerized microtubule structure. (d) View of the  $\alpha 2$ ,  $\beta 2$ -tubulin interaction of the aligned  
 365 complexes in (a). The  $\alpha T5$  loops of apo tubulin and microtubule are highlighted in red and blue,  
 366 respectively. The  $\alpha T5$  loop outward shift makes room for  $\beta 2$ -tubulin to bind closer to  $\alpha 2$ -tubulin. (e)  
 367 View of the  $\beta 1$ ,  $\alpha 2$ -tubulin interaction of the aligned complexes in (b). Compared to the polymerized  
 368 microtubule structure (violetpurple), The  $\beta 1$ ,  $\alpha 2$ -tubulin inter-dimer interface exhibits a  $13.5^\circ$  bend  
 369 angle in apo tubulin structure (green) while only  $4.2^\circ$  in tubulin-compound 2 complex (salmon). (f)  
 370 The molecular mechanism of cevipabulin induced tubulin protofilaments polymerization. Cev:  
 371 cevipabulin. Cpt 2: compound 2.

372 *Cevipabulin and compound 1 destabilize tubulin by interacting with the GTP on*

373 *“nonexchangeable site” to promote tubulin degradation*

374 We then investigated the tubulin degradation effect of cevipabulin binding to the

375 seventh site. At the seventh site, cevipabulin bound to the intra-dimer interface and

376 made multiple polar contacts with  $\alpha 2$ -tubulin. In particular, the trifluoropropanyl of

377 cevipabulin formed two hydrogen bonds with non-exchangeable GTP (Fig. 2i), which

378 plays a structural role and is important for the stability of tubulin dimers [23, 24]. This

379 non-exchangeable GTP forms a number of hydrogen bonds with surrounding amino

380 acid residues and a magnesium ion [23]. Single mutation abolishing hydrogen bond with

381 this GTP could reduce the affinity of GTP and absence of the magnesium ion would

382 reduce the protein stability [23, 25]. We speculated that the interaction between

383 cevipabulin and the non-exchangeable GTP could decrease tubulin stability and

384 subsequently promote tubulin degradation. Differential scanning fluorimetry (DSF), a

385 method monitoring protein unfolding, results showed that tubulin treated by compound

386 **1** had an obvious lower  $T_m$  value (melting temperature) than DMSO treated, while

387 compound **2** increased the  $T_m$  value and cevipabulin had no significant effect on the

388  $T_m$  value (Fig. 6a). Further the DSF results showed that compound **1** (only binds to the

389 seventh site) reduces the stability of tubulin but compound **2** (only binds the vinblastine

390 site) increases the stability of tubulin, and cevipabulin (binds to both sites) may balance

391 these two effects and represent a neutralized output. TEM results also showed that

392 compound **1** decreased tubulin stability as evidenced by lots of spherical tubulin

393 aggregates (denatured or unfolding tubulin) observed upon compound **1** treatment (Fig.

394 6b). Using a thiol probe, tetraphenylethene maleimide (TPE-MI), which is non-  
395 fluorescent until conjugated to a thiol [26], we further measured whether these  
396 compounds promote unfolding of tubulin. TPE-MI alone did not increase fluorescence  
397 of tubulin while addition of 4M guanidine hydrochloride (non-selective protein  
398 denaturant) significantly increased fluorescence (Fig. 6c). Cevipabulin and compound  
399 **1** obviously increased tubulin fluorescence while vinblastine and compound **2** had no  
400 such effects (Fig. 6c), demonstrating that cevipabulin or compound **1** could promote  
401 unfolding of tubulin. In addition, PYR-41, an inhibitor of ubiquitin-activating enzyme  
402 E1, totally blocked compound **1** induced tubulin degradation (Fig. 6d), suggesting  
403 destabilized tubulin is removed by normal housekeeping ubiquitylation. Therefore,  
404 cevipabulin and compound **1** decrease tubulin stability by direct interaction with the  
405 non-exchangeable GTP to subsequently promote its destabilization and degradation.  
406

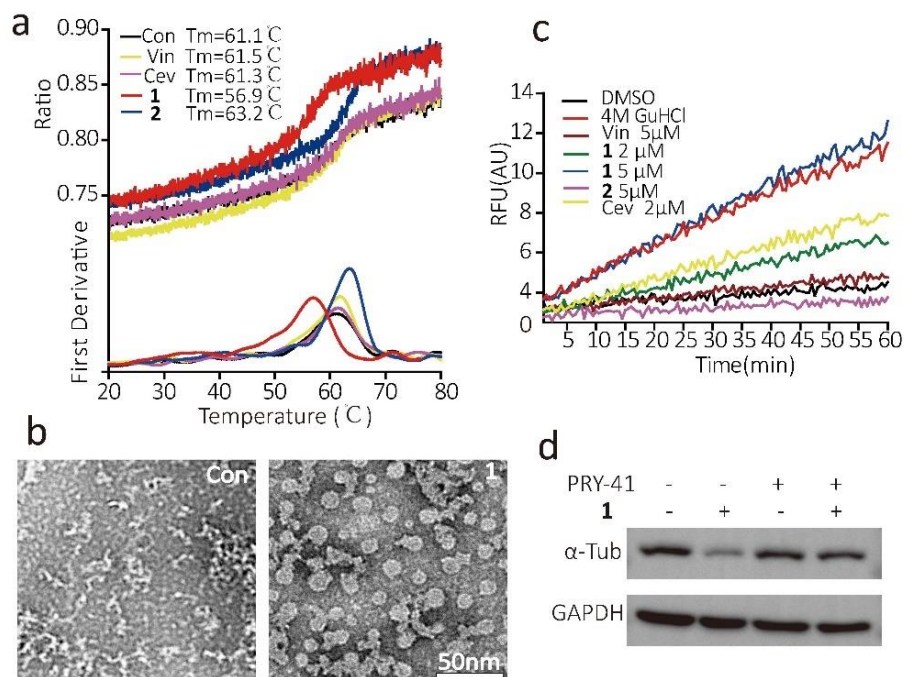

407

408 **Figure 6. Cevipabulin or compound 2 decrease tubulin stability to promote tubulin**  
409 **destabilization and degradation.** (a) Thermal unfolding curves of DMSO, cevipabulin (10  $\mu$ M),  
410 vinblastine (10  $\mu$ M), compound **1** (10  $\mu$ M) or compound **2** (10  $\mu$ M) treated purified tubulin (2  $\mu$ M)  
411 by a differential scanning fluorimetry (DSF) method. Plots of the fluorescence F350/F330 ratio and  
412 its first derivative are shown. The maximal values of the first derivatives are regarded as the melting  
413 temperature ( $T_m$  value). Results are representative of three independent experiments. (b) Purified  
414 tubulin (2mg/ml) was incubated with 50  $\mu$ M compound **1** for 30min at room temperature before  
415 imaged with TEM. Results are representative of three independent experiments. (c) Tubulin  
416 unfolding detected by TPE-MI. Tubulin (0.2 mg/ml) in PIPES buffer was mixed with 50  $\mu$ M TPE-  
417 MI and the indicated compounds. Fluorescence (Excitation wavelength: 350nm; Emission  
418 wavelength: 470nm) were detected every half minute for 60 min. Results are representative of three  
419 independent experiments. (d) Hela cells were treated with or without PYR-41(20  $\mu$ M) for 1 hour  
420 before treated with 10  $\mu$ M compound **1** for 16 h. Protein level of  $\alpha$ -tubulin were detected by  
421 immunoblotting. Results are representative of three independent experiments. Cev: cevipabulin; Vin:  
422 vinblastine. **1**: compound **1**; **2**: compound **2**.

423

## 424 **Discussion**

425 Our study identifies a novel binding site on  $\alpha$ -tubulin, the seventh site. As this new site  
426 is located near the non-exchangeable GTP site and this GTP is important for tubulin  
427 stability [23-25], inhibitors such as cevipabulin and compound **1** binding to the seventh  
428 site may reduce tubulin stability and promote tubulin degradation. This novel site on  $\alpha$ -  
429 tubulin is spatially corresponding to the vinblastine site on  $\beta$ -tubulin, which is also  
430 bound by cevipabulin. Cevipabulin binding to the vinblastine site enhances the  
431 longitudinal interaction within tubulin protofilaments to make them take a straighter  
432 conformation while blocks tubulin lateral interaction, causing excessive tubulin  
433 protofilaments polymerization, which randomly stack into irregular tubulin aggregates.  
434 The binding pocket of cevipabulin to these two sites is very similar (formed by  $\alpha$ H1,  
435  $\alpha$ H6,  $\alpha$ H7,  $\alpha$ T5,  $\beta$ H10,  $\beta$ T7 for the seventh site and  $\beta$ H1,  $\beta$ H6,  $\beta$ H7,  $\beta$ T5,  $\alpha$ H10,  $\alpha$ T7  
436 for the vinblastine site) and the binding modes of cevipabulin are also similar except  
437 the trifluoropropanyl of cevipabulin adopts different conformations. Vinblastine-site

438 cevipabulin is mainly located on  $\beta$ 1-tubulin and makes lots of hydrogen bond with  $\beta$ 1-  
439 tubulin while its trifluoropropanyl is oriented towards  $\alpha$ 2-tubulin and makes four  
440 hydrogen bond interactions with  $\alpha$ 2-tubulin. The-seventh-site cevipabulin is totally  
441 located on  $\alpha$ 2-tubulin and makes lots of hydrogen bond with  $\alpha$ 2-tubulin and its  
442 trifluoropropanyl is also oriented towards  $\alpha$ 2-tubulin to establish hydrogen bonds with  
443 the non-exchangeable GTP. Of note, compound **2** lacking the trifluoropropanyl could  
444 not bind to the seventh site and showed no tubulin degradation effect, suggesting the  
445 trifluoropropanyl-GTP interaction is important for cevipabulin binding to the seventh  
446 site. We noticed that in the tubulin-compound **2** complex, although compound **2** bound  
447 only to the vinblastine site, the  $\alpha$ T5 loop at the seventh site also had an outward shift  
448 like in the tubulin-cevipabulin complex. It seems to suggest that cevipabulin binds to  
449 the vinblastine site to allosterically affect the  $\alpha$ T5 loop with an unknown mechanism,  
450 and then creates the pocket for cevipabulin binding to  $\alpha$ 2-tubulin. However, vinblastine  
451 binding showed no such allosteric effect on  $\alpha$ T5 loop (Fig.S3h) and can not block  
452 cevipabulin binding to the seventh site, implying cevipabulin can bind to the seventh  
453 site and affect  $\alpha$ T5 loop itself. As compound **2** has no degradation effect but has  
454 allosteric effect on  $\alpha$ T5 loop, we can be sure that the  $\alpha$ T5 loop shift does not contribute  
455 to the degradation effect. Although we confirmed that compound **1** binds only to the  
456 seventh site and not to the vinblastine site, we unfortunately did not obtain the crystal  
457 structure of tubulin-compound **1** complex (possible due to compound **1**'s lower affinity  
458 to the seventh site) which might provide other vital information of the seventh site.  
459 We confirmed that cevipabulin is not an MSA as previous reported. The previously

460 observed turbidity increase [16] in *in vitro* tubulin polymerization assay is likely due to  
461 tubulin protofilaments polymerization rather than microtubule polymerization.  
462 Therefore, we believe that confirmation of MSA using only *in vitro* tubulin  
463 polymerization assay is not rigorous. In many CNS diseases, dysregulation of  
464 microtubule structure and dynamics is commonly observed in neurons [17, 27, 28] and  
465 stabilization of microtubules by MSA is a promising therapeutic strategy [27, 29].  
466 However, the traditional MSAs binding to the paclitaxel site have relative large  
467 molecule weights and can not penetrate the blood–brain barrier [27]. Researchers then  
468 focus on developing brain-penetrant MSAs with smaller molecule weight that could be  
469 readily synthesized, such as cevipabulin and its derivatives for the treatment of CNS  
470 diseases [30-32]. Our study indicates cevipabulin and its derivatives do not stabilize  
471 microtubule instead inversely promoting its degradation or inducing excessive tubulin  
472 protofilaments formation. These new mechanisms should be considered when studying  
473 the cevipabulin and its derivatives on CNS diseases, or there are other undiscovered  
474 mechanisms supporting their effects on CNS diseases.

475 Microtubules assembly demands bent-to-straight conformation change of tubulin  
476 dimers and protofilaments [8]. This conformation change is widely accepted, but the  
477 detailed molecular mechanism remains elusive. Microtubules polymerization demands  
478 GTP-bound tubulin dimers and there are two opposite models to describe the  
479 connection between GTP and tubulin dimer conformation change. The allosteric model  
480 claims that GTP binds to tubulin dimers, causing a remote allosteric conformation  
481 change to generate straighter tubulin protofilaments, and then lateral interactions

482 establishing lateral interactions to form microtubules [33-35]. However, the lattice  
483 model suggests that the GTP binding has no change on tubulin dimer conformation, but  
484 the lattice assembly straightens tubulin dimer to incorporate into microtubules [33, 36].  
485 Since most of the evidences in support of the two models are indirect, the debates can  
486 not be resolved. Here, high-resolution crystal structures of tubulin-cevipabulin and  
487 tubulin-compound **2** complexes directly revealed these compounds can cause a bent-  
488 to-straight conformation change in tubulin protofilament: two adjacent tubulin dimers  
489 get closer, transforming the inter-dimer-interface  $\alpha$ -tubulin into a “polymerized” state,  
490 including significant movement of  $\alpha$ H10,  $\alpha$ H8 and  $\alpha$ T7 in the inter-dimer interface and  
491 a succedent remotely allosteric mediated  $\alpha$ T5 outward shift in the intra-dimer interface.  
492 The  $\alpha$ T5 outward shift then makes the intra-dimer-interface  $\beta$ -tubulin bind to the  $\alpha$ -  
493 tubulin closer to form a straight dimer. We think this continuous conformation change  
494 could reflect the bent-to-straight conformation change of tubulin dimers in normal  
495 physiological condition, and provide clearly insights into MDI. More importantly, with  
496 these compounds binding as a small wedge, these straight protofilaments still have a  
497  $4.2^\circ$  curvature at the inter-dimer-interface and establish no lateral interaction,  
498 demonstrating the lateral interaction requires strict straight tubulin protofilaments and  
499 the lateral interaction is the consequence rather than cause of straight conformation  
500 formation. Therefore, our data supports the allosteric model.  
501 Here, we reported a novel binding site on  $\alpha$ -tubulin that possessed tubulin degradation  
502 effect that was distinct from the traditional MDAs and MSAs. Using this specific site,  
503 a new class of tubulin degraders can be designed as anticancer drug targeting  $\alpha$ -tubulin.



504 We also presented a novel function of tubulin inhibitors-induced irregular tubulin  
505 aggregation by enhancing longitudinal but blocking lateral interaction of tubulin, and  
506 the involved conformation change will provide insights into MDI.

## 507 **Materials and Methods**

### 508 *Reagents*

509 Colchicine, vinblastine, paclitaxel,  $\beta,\gamma$ -Methyleneadenosine 5'-triphosphate disodium  
510 salt (AMPPCP), Tetraphenylethene maleimide (TPE-MI), and DL-dithiothreitol (DTT)  
511 were purchased from Sigma; Guanidine, hydrochloride, MG132 and PYR-41 were  
512 obtained from Selleck; Cevipabulin was from MedChemExpress; Purified tubulin was  
513 bought from Cytoskeleton, Inc.; Antibodies ( $\alpha$ -tubulin antibody,  $\beta$ -tubulin antibody,  
514 GAPDH antibody and goat anti mouse second antibody) were bought from Abcam.

### 515 *Chemistry*

516 All the chemical solvents and reagents used in this study were analytically pure without  
517 further purification and commercially available. TLC was performed on 0.20 mm silica  
518 gel 60 F<sub>254</sub> plates (Qingdao Ocean Chemical Factory, Shandong, China). Visualization  
519 of spots on TLC plates was done by UV light. NMR data were measured for <sup>1</sup>H at 400  
520 MHz on a Bruker Avance 400 spectrometer (Bruker Company, Germany) using  
521 tetramethylsilane (TMS) as an internal standard. Chemical shifts were quoted in parts  
522 per million. High Resolution Mass Spectra (HRMS) were recorded on a Q-TOF Bruker  
523 Daltonics model IMPACT II mass spectrometer (Micromass, Manchester, UK) in a  
524 positive mode.

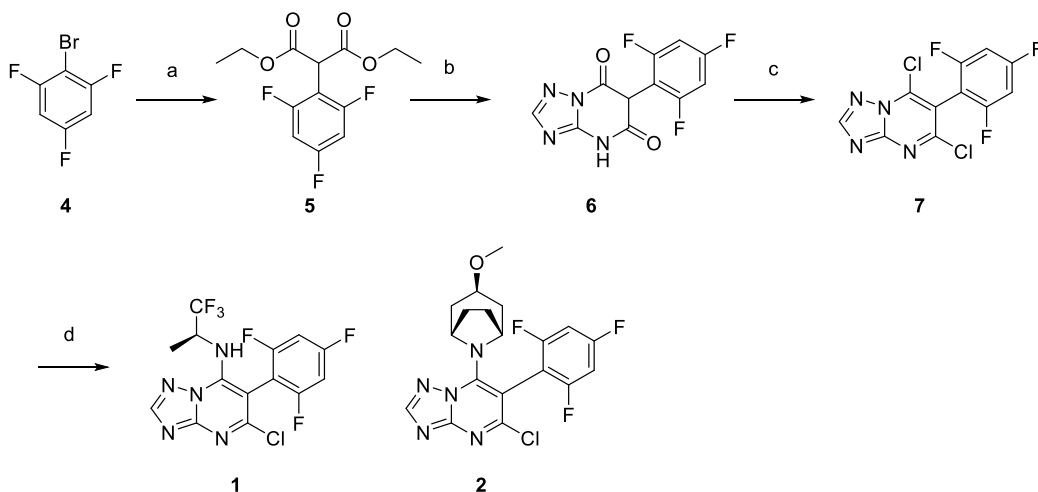

525

526 *Scheme 1: Reagents and conditions: a) diethyl malonate, NaH, CuI, dioxane, r.t.-*

527 *reflux; b) 3-amino-1,2,4-triazole, tributylamine, 180 °C; c) POCl<sub>3</sub>, reflux; d) amine,*

528

*K<sub>2</sub>CO<sub>3</sub>, DMF, r.t.*

529 **General procedure for the synthesis of diethyl 2-(2,4,6-trifluorophenyl)malonate (5)**

530 To a stirred solution of diethyl malonate (320 mg, 2.0 mmol) in 1,4-dioxane was added

531 60% sodium hydride (96 mg, 2.4 mmol) by portions at room temperature. Then copper

532 (I) bromide (380 mg, 2.0 mmol) and compound 4 (211 mg, 1.0 mmol) was added. The

533 reaction mixture was stirred at room temperature for 30 minutes and then refluxed for

534 8 hours under nitrogen protection. After completion of the reaction, the mixture was

535 cooled to room temperature and hydrochloric acid (12 N, 50 mL) was added slowly.

536 The organic phase was separated off and the aqueous phase was extracted with ethyl

537 acetate (×2). The combined organic phase was concentrated in vacuo. The residue was

538 purified by chromatograph on silica gel with petroleum ether and ethyl acetate as eluent

539 to give compound 5 as a white solid. Yield: 62%. <sup>1</sup>H NMR (400 MHz, DMSO) δ 7.36

540 – 7.18 (m, 2H), 5.15 (s, 1H), 4.18 (q, *J* = 7.1 Hz, 4H), 1.23 – 1.14 (m, 6H). HRMS-ESI:

541 calcd for [C<sub>13</sub>H<sub>13</sub>F<sub>3</sub>O<sub>4</sub>+Na]<sup>+</sup> 313.0664, found: 313.0663.

542 **General procedure for the synthesis of 5,7-dichloro-6-(2,4,6-trifluorophenyl)-**

543 **[1,2,4]triazolo[1,5-*a*]pyrimidine (7)**

544 A mixture of 3-amino-1,2,4-triazole (84 mg, 1.0 mmol), compound 5 (290 mg, 1.0

545 mmol) and tributylamine (1.0 mL) was heated at 180 °C for 4 hours. After the reaction

546 mixture was cooled to room temperature, the residue was diluted with dichloromethane,

547 washed with dilute hydrochloric acid and water and crystallized from diisopropyl ether  
548 to yield 116 mg of compound **6** (brown solid, 41% yield). Then phosphorus  
549 oxitrichloride (10 mL) was added to a 25 mL round-bottom flask filled with compound  
550 **6** (282 mg, 1.0 mmol), and refluxed for 4 hours. After completion of the reaction, the  
551 reaction mixture was cooled to room temperature and the solvent was distilled off. The  
552 residue was diluted with water and ether acetate. The organic phase was separated,  
553 washed with dilute sodium bicarbonate solution and brine, dried, concentrated in vacuo  
554 and purified by chromatograph on silica gel with petroleum ether and ethyl acetate as  
555 eluent to give compound **7** as a white solid. Yield: 66%, <sup>1</sup>H NMR (400 MHz, DMSO)  
556 δ 8.90 (s, 1H), 7.62-7.55 (m, 2H). HRMS-ESI: calcd for [C<sub>11</sub>H<sub>3</sub>Cl<sub>2</sub>F<sub>3</sub>N+H]<sup>+</sup> 318.9765,  
557 320.9736, found: 318.9764, 320.9739; calcd for [C<sub>11</sub>H<sub>3</sub>Cl<sub>2</sub>F<sub>3</sub>N+Na]<sup>+</sup> 340.9585,  
558 342.9555, found: 340.9576, 342.9565.

559 General procedure for the synthesis of **1-2**

560 Compounds **1** and **2** were prepared as described in Zhang et al[37]. Compound **7** (160  
561 mg, 0.5 mmol), (*S*)-1,1,1-trifluoropropan-2-amine hydrochloride (75 mg, 0.5 mmol, for  
562 **1**), or (1*R*,3*r*,5*S*)-3-methoxy-8-azabicyclo[3.2.1]octane (71 mg, 0.5 mmol for **2**), and  
563 potassium carbonate (276mg, 2.0 mmol) was dissolved in DMF (5 mL) and stirred at  
564 room temperature for 4 hours. After completion of the reaction, water and ethyl acetate  
565 was added. The organic phase was separated, washed with brine, dried over anhydrous  
566 sodium sulfate, concentrated in vacuo and purified by chromatograph on silica gel with  
567 petroleum ether and ethyl acetate as eluent to give compounds **1 and 2** as white solid.  
568 Yield: 48%-63%.

569 (*S*)-5-chloro-6-(2,4,6-trifluorophenyl)-*N*-(1,1,1-trifluoropropan-2-yl)-  
570 [1,2,4]triazolo[1,5-*a*]pyrimidin-7-amine (**1**)

571 Yield: 48%, <sup>1</sup>H NMR (400 MHz, CDCl<sub>3</sub>) δ 8.40 (s, 1H), 6.93-6.89 (m, 2H), 5.96  
572 (d, *J* = 10.6 Hz, 1H), 4.75 (s, 1H), 1.43 (t, *J* = 10.0 Hz, 3H). HRMS-ESI: calcd for  
573 [C<sub>14</sub>H<sub>8</sub>ClF<sub>6</sub>N<sub>5</sub>+H]<sup>+</sup> 396.0451, found 396.0488; calcd for [C<sub>14</sub>H<sub>8</sub>ClF<sub>6</sub>N<sub>5</sub>+Na]<sup>+</sup> 418.0270,  
574 found 418.0263.

575 5-chloro-7-((1*R*,3*r*,5*S*)-3-methoxy-8-azabicyclo[3.2.1]octan-8-yl)-6-(2,4,6-

576 trifluorophenyl)-[1,2,4]triazolo[1,5-*a*]pyrimidine (**2**)

577 Yield: 63%, <sup>1</sup>H NMR (400 MHz, DMSO) δ 8.57 (s, 1H), 7.52-7.48 (m, 2H), 4.58  
578 (s, 2H), 3.43 (t, *J* = 4.0 Hz, 1H), 3.17 (s, 3H), 2.01 (dt, *J* = 10.2, 5.1 Hz, 4H), 1.90 (d, *J*  
579 = 14.6 Hz, 2H), 1.77 – 1.67 (m, 2H). HRMS-ESI: calcd for [C<sub>19</sub>H<sub>17</sub>ClF<sub>3</sub>N<sub>5</sub>O+H]<sup>+</sup>  
580 424.1152, found 424.1152; calcd for [C<sub>19</sub>H<sub>17</sub>ClF<sub>3</sub>N<sub>5</sub>O+Na]<sup>+</sup> 446.0971, found 446.0964.

### 581 *Cell culture*

582 HeLa, Hct116, H460 and SU-DHL-6 cells were all sourced from American Type  
583 Culture Collection. H460 cells were cultured in RPMI 1640 medium and HeLa, Hct116  
584 and SU-DHL-6 cells were cultured in Dulbecco's Modified Eagle's medium. Both  
585 media were supplemented with 5%-10% fetal bovine serum and about 1% penicillin-  
586 streptomycin. The culture temperature was set at 37°C, and cells were grown in a  
587 humidified incubator with 5% CO<sub>2</sub>. All cells have been authenticated by STR tests and  
588 are free of mycoplasma.

### 589 *Label free Quantitative Proteomics*

590 HeLa cells were treated with or without 1 μM cevipabulin for six hours and then all cells  
591 were collected and lysed with radioimmunoprecipitation assay buffer (containing  
592 proteinase inhibitor mixture) for 30min on ice. Then all samples were centrifuged at  
593 10,000 g for 30 minutes to pellet cell debris. Supernatants were collected and stored at  
594 -80°C before analysis. We have done three biological repeats. Then the following label-  
595 free quantitative proteomic analysis of these samples were carried out following the  
596 procedure as described previously[38].

### 597 *Immunoblotting*

598 Cells were plated on six-well plates and cultured for 24hours before treated with

599 different compounds for different time. Total cells were harvested and washed by  
600 phosphate buffer saline (PBS) before centrifuged at 1000 g for 3min. Then 1×loading  
601 buffer (diluted from 6×loading buffer by radioimmunoprecipitation assay buffer I) was  
602 added to the cell pellets and lysed for 10min. Samples were then incubated in boiling  
603 water for 10 min and then stored at -20°C before use. Equal volume of samples was  
604 loaded to 10% SDS-PAGE for electrophoresis and then transferred to a polyvinylidene  
605 difluoride (PVDF) membranes at 4°C for 2 hours. Proteins on PVDF membranes were  
606 incubated in blocking buffer (5% skim milk diluted in 1×PBST(PBS buffer with 0.1%  
607 Tween-20)) for 1hours. Then the PVDF membranes were incubated with first  
608 antibodies (diluted in blocking buffer) for 12hours and washed for three times with  
609 PBST before incubated with second antibody (diluted in blocking buffer) for 45 min  
610 and washed for three times with PBST again. At last, the PVDF membranes were  
611 immersed in enhanced chemiluminescence reagents for 30 seconds subjected to image  
612 with a chemiluminescence image analysis system (Tianneng, China).

### 613 *Immunofluorescence*

614 HeLa cells were grown on microscope cover glass in 24-well plates for 24 hours before  
615 treated with different compounds for various time. Then the medium was removed and  
616 cells were washed with prewarmed (37°C) PBS for 2 min before fixed with 50%  
617 methanol/ 50% acetone for 3 min. The fixed cells were washed with PBS for 2 min  
618 again before incubated with  $\alpha$ -tubulin antibody (dilute in PBST containing 5% bovine  
619 serum albumin) for 4 h at room temperature. Cells were then washed with PBST for  
620 tree times (3×5 min) and followed by incubation in fluorescent second antibody (dilute

621 in PBST containing 5% bovine serum albumin) for 45min at room temperature. Three  
622 times wash with PBST was performed again to remove unbounded second-antibody  
623 before imaging using a fluorescence microscope (Zeiss, Germany)

#### 624 *Quantitative-PCR*

625 HeLa and Hct116 cells were plated on six-well plates and culture for 24hours before  
626 treated with cevipabulin for different time. Total mRNA of both HeLa and Hct116 cells  
627 were extracted with TRIzol (Invitrogen, USA) agents following the manufacturer's  
628 protocol and then qualified using a NanoDrop1000 spectrophotometer (Thermo Fisher  
629 Scientific, USA). The cDNA synthesis was carried out using a high Capacity cDNA  
630 Reverse Transcription Kit (Applied Biosystems, USA). Taq Universal SYBR Green  
631 Supermix (BIO-RAD, USA) was employed for further Quantitative PCR analysis on a  
632 CFX96 Real-time PCR System (BIO-RAD, USA). Relative mRNA level of both  $\alpha$ -  
633 *tubulin* and  $\beta$ -*tubulin* were normalized to that of GAPDH.

#### 634 *Single amino acid substitution on $\alpha$ -tubulin*

635 The pIRESneo-EGFP-alpha Tubulin plasmid was obtained from Addgene (USA) and  
636 mutation (Y224G) of  $\alpha$ -Tubulin were performed using a Q5 Site-Directed Mutagenesis  
637 kit (NEB #E0554S, USA). Hela cells were plated on six-well plates and incubated for  
638 24 hours before transfected with these plasmids by Lipofectamine 2000. Then cells  
639 were culture for another 24hours before treated with or without different compounds  
640 for 16hours. Total protein was extracted and analyzed by immunoblotting to detect the  
641 content of GTP- $\alpha$ -tubulin and GAPDH was employed as loading control.

#### 642 *Transmission electron microscopy*

643 Purified porcine tubulin (2mg/ml) was diluted in PIPES buffer (80 mM PIPES, pH 6.9,  
644 0.5 mM EGTA, 2 mM MgCl<sub>2</sub>) supplemented with 1 mM GTP. Different compounds  
645 were then incubated with tubulin at room temperature for 30 min. About 5µL of each  
646 sample solution was added to a 230-mesh per inch, carbon films supported formvar.  
647 Then the sample was stained with 2% (w/v) phosphotungstic acid for 60 seconds. A  
648 Tecnai G2 F20 S-TWIN electron microscope (FEI, USA) was used for observation.

#### 649 *Differential Scanning Fluorimetry*

650 Purified porcine tubulin (0.2mg/ml) was diluted in PIPES buffer supplemented with 1  
651 mM GTP. Different compounds were added to tubulin solution and incubated for 15min  
652 at room temperature. Then capillaries were immersed into tubulin solutions to load the  
653 samples for tests using the nanoDSF (Prometheus NT.48, NanoTemper, Germany). The  
654 temperature range was set at 20-80°C and heating rate at 1°C/min. The fluorescence of  
655 tryptophan fluorescence at 330nm (330F) and 350nm (350F) were detected and the  
656 melting temperatures (T<sub>m</sub> value) of tubulin were calculated as the maximum of the first  
657 derivative of the F350/F330 fluorescence ratios.

#### 658 *TPE-MI as a thiol probe to detect unfolded protein*

659 TPE-MI is a small molecule which is inherently non-fluorescent until covalently binds  
660 to a thiol by its maleimide [26, 39]. This molecule could be used to monitor purified  
661 protein unfolding *in vitro* [26]. Purified tubulin (0.2mg/ml) was diluted in PIPES buffer  
662 supplemented with 1 mM GTP and then mixed with 50 µM TPE-MI and different  
663 compounds. The samples were then immediately subjected to a microplate reader  
664 (Biotek, USA) to detect the fluorescence (Excitation wavelength:350nm; Emission

665 wavelength: 470nm) every half minute for 60 min.

### 666 *Structural Biology*

667 Protein expression and purification were detailly described in our precious study [40].

668 Tubulin, RB3 and TTL (2:1.3:1.2 molar ratio) were mixed together, then 5 mM tyrosine,

669 10 mM DTT and 1 mM AMPPCP were added and then the mixture was concentrated

670 to about 15 mg/ml at 4 °C. The crystallization is conducted using a sitting-drop vapor-

671 diffusion method under 20°C and the crystallization buffer is optimized as: 6%

672 PEG4000, 8% glycerol, 0.1 M MES (pH 6.7), 30 mM CaCl<sub>2</sub>, and 30 mM MgCl<sub>2</sub>.

673 Seeding method was also used to obtain single crystals. Crystals appeared in about 2-

674 days and in a rod like shape and the size reached maximum dimensions within one week.

675 About 0.1 μL cevipabulin (diluted in DMSO with a concentration of 100 mM ) was

676 added to a drop containing tubulin crystal and incubated for 16 h at 20 °C. The following

677 data collection and structure determination were the same as previous description [40].

### 678 *Statistical analysis*

679 Data are presented as means. Statistical differences were determined using an unpaired

680 Student's t test. p values are indicated in figure legend when necessary: \*\*, p< 0.001;

681 \*\*\*, p< 0.0001.

### 682 **Acknowledgement**

683 This work received funds from National Natural Science Foundation of China

684 (81872900, 81803021); 1.3.5 project for disciplines of excellence, West China Hospital,

685 Sichuan University; National Major Scientific and Technological Special Project for

686 'Significant New Drugs Development' (2018ZX09201018-021); Post-Doctor Research



687 Project, Sichuan University (2020SCU12036); China Postdoctoral Science Foundation  
688 Grants (2019T120855 and 2019M650248); Sichuan Science and Technology Program  
689 Grants (2019YJ0088, 2019YFH0123 and 2019YFH0124). Post-doctoral Research  
690 Project, West China Hospital, Sichuan University Grant 2018HXBH027.

#### 691 **Author contributions**

692 J.Y. performed most of the cellular and biochemical experiments and wrote the draft.  
693 J.Y., Y.Y., W.Y, L.N. and Q.C. performed the structural biology experiments. Y.L.  
694 synthesized all chemical compounds. H.Y., Y.Z., Z.W., Z.Y., H.P., H.W., M.Z., J. W.  
695 L.Y., and L.O., performed some of these biochemical experiments. W.Y., J.Y., W.L. and  
696 L.C. conceived the idea and supervised the study. J.Y., Q.C., W.L. and L.C. revised the  
697 manuscript.

698 All authors approved the final manuscript.

#### 699 **Conflict of interest**

700 The authors declare no competing financial interests.

#### 701 **Data availability.**

702 Atomic coordinates and structure factors of tubulin complexed with cevipabulin have  
703 been deposited in the Protein Data Bank under accession code 7CLD. Further  
704 information and requests for resources and reagents should be directed to and will be  
705 fulfilled by Jianhong Yang ([yjh1988@scu.edu.cn](mailto:yjh1988@scu.edu.cn)).

#### 706 **Reference**

- 707 [1] Arnst KE, Banerjee S, Chen H, Deng S, Hwang DJ, Li W, et al. Current advances of tubulin  
708 inhibitors as dual acting small molecules for cancer therapy. Medicinal research reviews.  
709 2019;39:1398-426.  
710 [2] Haider K, Rahaman S, Yar MS, Kamal A. Tubulin inhibitors as novel anticancer agents: an

- 711 overview on patents (2013-2018). Expert opinion on therapeutic patents. 2019;29:623-41.
- 712 [3] Gigant B, Wang C, Ravelli RB, Roussi F, Steinmetz MO, Curmi PA, et al. Structural basis for the  
713 regulation of tubulin by vinblastine. *Nature*. 2005;435:519-22.
- 714 [4] Doodhi H, Prota AE, Rodríguez-García R, Xiao H, Custar DW, Bargsten K, et al. Termination of  
715 protofilament elongation by eribulin induces lattice defects that promote microtubule  
716 catastrophes. *Current Biology*. 2016;26:1713-21.
- 717 [5] Yang J, Wang Y, Wang T, Jiang J, Botting CH, Liu H, et al. Pironetin reacts covalently with  
718 cysteine-316 of  $\alpha$ -tubulin to destabilize microtubule. *Nature communications*. 2016;7:1-9.
- 719 [6] Kavallaris M. Microtubules and resistance to tubulin-binding agents. *Nature Reviews Cancer*.  
720 2010;10:194-204.
- 721 [7] Prota AE, Setter J, Waight AB, Bargsten K, Murga J, Diaz JF, et al. Pironetin binds covalently to  
722  $\alpha$ Cys316 and perturbs a major loop and helix of  $\alpha$ -tubulin to inhibit microtubule formation. *Journal*  
723 *of Molecular Biology*. 2016;428:2981-8.
- 724 [8] Manka SW, Moores CA. The role of tubulin-tubulin lattice contacts in the mechanism of  
725 microtubule dynamic instability. *Nature structural & molecular biology*. 2018;25:607-15.
- 726 [9] Prota AE, Bargsten K, Northcote PT, Marsh M, Altmann KH, Miller JH, et al. Structural basis of  
727 microtubule stabilization by laulimalide and peloruside A. *Angewandte Chemie International*  
728 *Edition*. 2014;53:1621-5.
- 729 [10] Prota AE, Bargsten K, Diaz JF, Marsh M, Cuevas C, Liniger M, et al. A new tubulin-binding site  
730 and pharmacophore for microtubule-destabilizing anticancer drugs. *Proceedings of the National*  
731 *Academy of Sciences*. 2014;111:13817-21.
- 732 [11] Prota AE, Bargsten K, Zurwerra D, Field JJ, Díaz JF, Altmann K-H, et al. Molecular mechanism  
733 of action of microtubule-stabilizing anticancer agents. *Science*. 2013;339:587-90.
- 734 [12] Ravelli RB, Gigant B, Curmi PA, Jourdain I, Lachkar S, Sobel A, et al. Insight into tubulin  
735 regulation from a complex with colchicine and a stathmin-like domain. *Nature*. 2004;428:198-202.
- 736 [13] Steinmetz MO, Prota AE. Microtubule-targeting agents: strategies to hijack the cytoskeleton.  
737 *Trends in cell biology*. 2018;28:776-92.
- 738 [14] Dorléans A, Gigant B, Ravelli RB, Mailliet P, Mikol V, Knossow M. Variations in the colchicine-  
739 binding domain provide insight into the structural switch of tubulin. *Proceedings of the National*  
740 *Academy of Sciences*. 2009;106:13775-9.
- 741 [15] Ayral-Kaloustian S, Zhang N, Beyer C. Cevipabulin (TTI-237): preclinical and clinical results for  
742 a novel antimicrotubule agent. *Methods and findings in experimental and clinical pharmacology*.  
743 2009;31:443.
- 744 [16] Beyer CF, Zhang N, Hernandez R, Vitale D, Lucas J, Nguyen T, et al. TTI-237: a novel  
745 microtubule-active compound with in vivo antitumor activity. *Cancer research*. 2008;68:2292-300.
- 746 [17] Kovalevich J, Cornec A-S, Yao Y, James M, Crowe A, Lee VM-Y, et al. Characterization of brain-  
747 penetrant pyrimidine-containing molecules with differential microtubule-stabilizing activities  
748 developed as potential therapeutic agents for Alzheimer's disease and related tauopathies. *Journal*  
749 *of Pharmacology and Experimental Therapeutics*. 2016;357:432-50.
- 750 [18] Sáez-Calvo G, Sharma A, de Asís Balaguer F, Barasoain I, Rodríguez-Salarichs J, Olieric N, et  
751 al. Triazolopyrimidines are microtubule-stabilizing agents that bind the Vinca inhibitor site of  
752 tubulin. *Cell chemical biology*. 2017;24:737-50. e6.
- 753 [19] Nasrin SR, Kabir AMR, Konagaya A, Ishihara T, Sada K, Kakugo A. Stabilization of microtubules  
754 by cevipabulin. *Biochemical and biophysical research communications*. 2019;516:760-4.

- 755 [20] Nasrin SR, Ishihara T, Kabir AMR, Konagaya A, Sada K, Kakugo A. Comparison of microtubules  
756 stabilized with the anticancer drugs cevipabulin and paclitaxel. *Polymer Journal*. 2020;1-8.
- 757 [21] Beyer CF, Zhang N, Hernandez R, Vitale D, Nguyen T, Ayrál-Kaloustian S, et al. The  
758 microtubule-active antitumor compound TTI-237 has both paclitaxel-like and vincristine-like  
759 properties. *Cancer chemotherapy and pharmacology*. 2009;64:681-9.
- 760 [22] Stanton RA, Gernert KM, Nettles JH, Aneja R. Drugs that target dynamic microtubules: a new  
761 molecular perspective. *Medicinal research reviews*. 2011;31:443-81.
- 762 [23] Menéndez M, Rivas G, Díaz JF, Andreu JM. Control of the structural stability of the tubulin  
763 dimer by one high affinity bound magnesium ion at nucleotide N-site. *Journal of Biological  
764 Chemistry*. 1998;273:167-76.
- 765 [24] Spiegelman BM, Penningroth SM, Kirschner MW. Turnover of tubulin and the N site GTP in  
766 Chinese hamster ovary cells. *Cell*. 1977;12:587-600.
- 767 [25] Keays DA, Tian G, Poirier K, Huang G-J, Siebold C, Cleak J, et al. Mutations in  $\alpha$ -tubulin cause  
768 abnormal neuronal migration in mice and lissencephaly in humans. *Cell*. 2007;128:45-57.
- 769 [26] Chen MZ, Moily NS, Bridgford JL, Wood RJ, Radwan M, Smith TA, et al. A thiol probe for  
770 measuring unfolded protein load and proteostasis in cells. *Nature communications*. 2017;8:1-11.
- 771 [27] Zhang B, Maiti A, Shively S, Lakhani F, McDonald-Jones G, Bruce J, et al. Microtubule-binding  
772 drugs offset tau sequestration by stabilizing microtubules and reversing fast axonal transport  
773 deficits in a tauopathy model. *Proceedings of the National Academy of Sciences*. 2005;102:227-  
774 31.
- 775 [28] Zhang F, Su B, Wang C, Siedlak SL, Mondragon-Rodriguez S, Lee H-g, et al. Posttranslational  
776 modifications of  $\alpha$ -tubulin in alzheimer disease. *Translational neurodegeneration*. 2015;4:1-9.
- 777 [29] Zhang B, Carroll J, Trojanowski JQ, Yao Y, Iba M, Potuzak JS, et al. The microtubule-stabilizing  
778 agent, epothilone D, reduces axonal dysfunction, neurotoxicity, cognitive deficits, and Alzheimer-  
779 like pathology in an interventional study with aged tau transgenic mice. *Journal of Neuroscience*.  
780 2012;32:3601-11.
- 781 [30] Ballatore C, Brunden KR, Trojanowski JQ, Lee VM-Y, Smith III AB. Non-naturally occurring  
782 small molecule microtubule-stabilizing agents: A potential tactic for CNS-directed therapies. *ACS  
783 Publications*; 2017.
- 784 [31] Lou K, Yao Y, Hoyer AT, James MJ, Cornec A-S, Hyde E, et al. Brain-penetrant, orally  
785 bioavailable microtubule-stabilizing small molecules are potential candidate therapeutics for  
786 Alzheimer's disease and related tauopathies. *Journal of medicinal chemistry*. 2014;57:6116-27.
- 787 [32] Brunden KR, Trojanowski JQ, Smith III AB, Lee VM-Y, Ballatore C. Microtubule-stabilizing  
788 agents as potential therapeutics for neurodegenerative disease. *Bioorganic & medicinal chemistry*.  
789 2014;22:5040-9.
- 790 [33] Rice LM, Montabana EA, Agard DA. The lattice as allosteric effector: structural studies of  $\alpha\beta$ -  
791 and  $\gamma$ -tubulin clarify the role of GTP in microtubule assembly. *Proceedings of the National  
792 Academy of Sciences*. 2008;105:5378-83.
- 793 [34] Nogales E, Wang HW. Structural mechanisms underlying nucleotide-dependent self-  
794 assembly of tubulin and its relatives. *Current Opinion in Structural Biology*. 2006;16:221-9.
- 795 [35] Wang H-W, Nogales E. Nucleotide-dependent bending flexibility of tubulin regulates  
796 microtubule assembly. *Nature*. 2005;435:911-5.
- 797 [36] Buey RM, Díaz JF, Andreu JM. The nucleotide switch of tubulin and microtubule assembly: a  
798 polymerization-driven structural change. *Biochemistry*. 2006;45:5933-8.

799 [37] Zhang N, Ayral-Kaloustian S, Nguyen T, Afragola J, Hernandez R, Lucas J, et al. Synthesis and  
800 SAR of [1, 2, 4] triazolo [1, 5-a] pyrimidines, a class of anticancer agents with a unique mechanism  
801 of tubulin inhibition. *Journal of medicinal chemistry*. 2007;50:319-27.  
802 [38] Yang J, Li Y, Yan W, Li W, Qiu Q, Ye H, et al. Covalent modification of Cys-239 in  $\beta$ -tubulin by  
803 small molecules as a strategy to promote tubulin heterodimer degradation. *Journal of Biological*  
804 *Chemistry*. 2019;294:8161-70.  
805 [39] Liu Y, Yu Y, Lam JW, Hong Y, Faisal M, Yuan WZ, et al. Simple Biosensor with High Selectivity  
806 and Sensitivity: Thiol-Specific Biomolecular Probing and Intracellular Imaging by AIE Fluorogen on  
807 a TLC Plate through a Thiol-Ene Click Mechanism. *Chemistry—A European Journal*. 2010;16:8433-  
808 8.  
809 [40] Niu L, Yang J, Yan W, Yu Y, Zheng Y, Ye H, et al. Reversible binding of the anticancer drug  
810 KXO1 (tirbanibulin) to the colchicine-binding site of  $\beta$ -tubulin explains KXO1's low clinical toxicity.  
811 *Journal of Biological Chemistry*. 2019;294:18099-108.

812

813

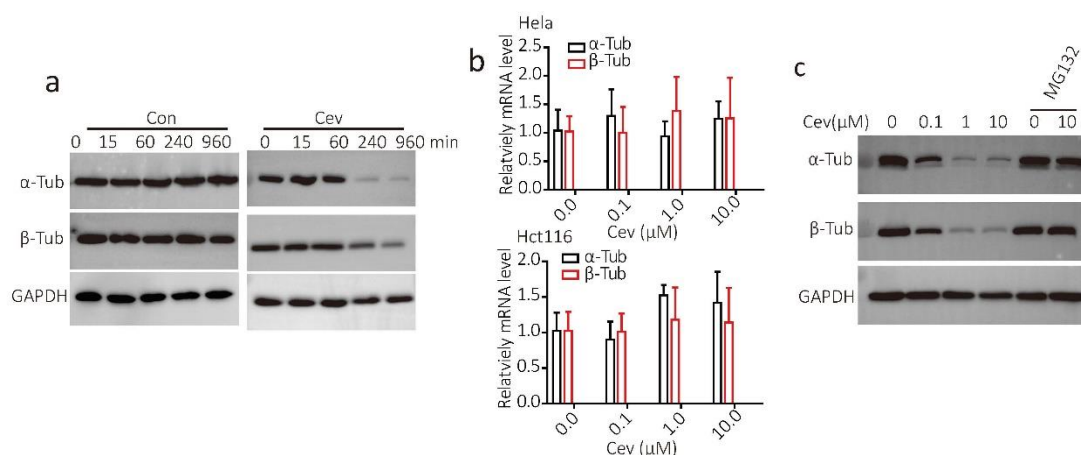

814

815 **Figure S1: Cevipabulin promotes proteasome-dependent degradation of  $\alpha$ - and  $\beta$ -tubulin.** (a)

816 HeLa cells were treated with 1  $\mu$ M cevipabulin for the indicated times and then the  $\alpha$  and  $\beta$ -  
817 tubulin levels were detected by immunoblotting. Results are representative of two independent  
818 experiments. (b) HeLa and Hct116 cells were treated with indicated concentrations of cevipabulin  
819 for 16 hours, and then mRNA levels of both  $\alpha$ -tubulin and  $\beta$ -tubulin were measured by  
820 quantitative-PCR. Data were shown as means  $\pm$  SD of three independent experiments. (c) Cells  
821 were treated with or without MG132 (20  $\mu$ M) for one hour before treated with different  
822 concentrations of cevipabulin for 16 hours. Protein levels of both  $\alpha$ - and  $\beta$ -tubulin were detected  
823 by immunoblotting. Results are representative of two independent experiments. Cev: cevipabulin.

824

825

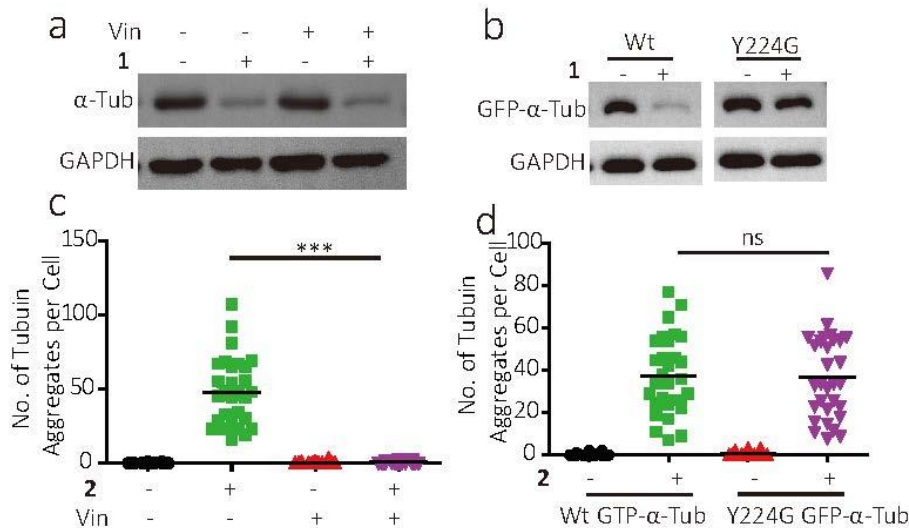

826

827 **Figure S2. Compound 1 binds to vinblastine site to induce formation of irregular tubulin**  
828 **aggregates and compound 2 binds to the seventh site to induce tubulin degradation.** (a) HeLa

829 cells were treated with or without 10  $\mu$ M vinblastine for 1 hour before treated with 10  $\mu$ M  
830 compound 1 for 16 h and then the protein level of  $\alpha$ -tubulin was detected by immunoblotting.

831 Results are representative of three independent experiments. (b) Vectors expressing either wild

832 type or Y224G mutant GFP-tubulin were transfected to HeLa cells. After 24 hours, cells were

833 treated with or without 10  $\mu$ M compound 1 for 16 h. Then the protein level of GFP- $\alpha$ -tubulin was

834 detected by immunoblotting. Results are representative of three independent experiments. (c)

835 HeLa cells were treated with or without 10  $\mu$ M vinblastine for 1 hour before treated with 10  $\mu$ M

836 compound 2 for another hour, and irregular tubulin aggregates were detected using

837 immunofluorescence and the number of irregular tubulin aggregates were counted for randomly

838 chosen 30 cells. \*\*\* $p < 0.0001$ . Results are representative of three independent experiments. (d)

839 Vectors expressing either wild type or Y224G mutant GFP- $\alpha$ -tubulin were transfected to HeLa

840 cells. After 24 hours, cells were treated with or without 10  $\mu$ M compound 2 for 1 h. Irregular

841 tubulin aggregates were detected using immunofluorescence and the number of irregular tubulin

842 aggregates were counted for randomly chosen 30 cells. ns: no significant difference. Results are

843 representative of three independent experiments. Vin: vinblastine. 1: compound 1; 2: compound

844

2.

845

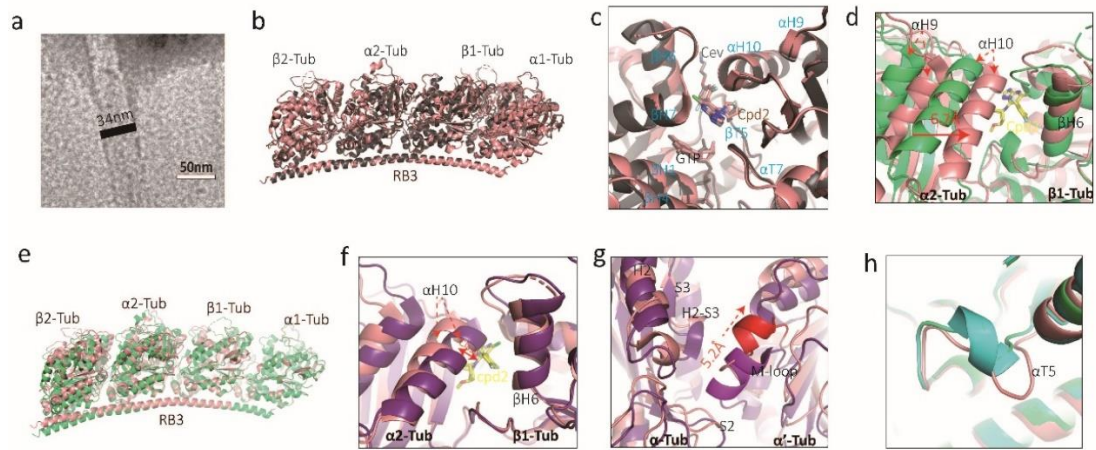

846

847

**Figure S3. Structural mechanism of cevipabulin and compound 2 induced tubulin protofilaments polymerization. (a)** TEM analysis of 50  $\mu$ M paclitaxel treated purified tubulin.

848

**(b)** Overview of the aligned structures of tubulin-cevipabulin complex (dark) and tubulin-

849

compound **2** complex (salmon) (PDB code: 5NJH).

850

**(c)** Close-up view of the cevipabulin and compound **2** binding to inter-dimer interface in the aligned complexes in **(b)**.

851

**(d)** Close-up view of the inter-dimer interface of the aligned structures of apo tubulin (green) and tubulin-compound **2**

852

complex (dark), which are superimposed on  $\beta$ 1-tubulin subunit. Compound **2** is shown as yellow

853

stick. **(e)** Overview of the aligned structures in **(d)**.

854

**(f)** Close-up view of the inter-dimer interface of the aligned structures of tubulin-compound **2** complex (salmon) and the polymerized

855

microtubule (violetpurple, PDB code: 6DPV), which are superimposed on  $\beta$ 1-tubulin subunit.

856

Compound **2** is shown as yellow stick. **(g)** Two tubulin-compound **2** complexes aligned to two

857

adjacent protofilaments in polymerized microtubule structure on  $\beta$ 1-tubulin respectively to

858

analyze the lateral interaction. M-loop in tubulin-compound **2** complex and the polymerized

859

microtubule structure are colored in red and purple respectively. **(h)** Tubulin-compound **2**

860

(salmon), tubulin-vinblastine (cyan, PDB code: 5J2T) and apo tubulin (green) were aligned on  $\alpha$ 2-

861

tubulin and the close-up view of T5 loops of  $\alpha$ 2-tubulin were shown. Cev: cevipabulin. cpd2:

862

compound **2**.

863

864

865

866

**Table S1. Data collection and refinement statistics.**

867

| Tubulin-cevipabulin                |                         |
|------------------------------------|-------------------------|
| <b>Data collection</b>             |                         |
| Space group                        | $P2_12_12_1$            |
| Cell dimensions                    |                         |
| $a, b, c$ (Å)                      | 104.4 160.8 174.8       |
| $\alpha, \beta, \gamma$ (°)        | 90.0 90.0 90.0          |
| Resolution (Å)                     | 50.0-2.60 (2.64-2.60) * |
| $R_{\text{pim}}$                   | 3.1 (42.2)              |
| $I/\sigma I$                       | 23.6 (2.0)              |
| Completeness (%)                   | 100 (100)               |
| Redundancy                         | 13.4 (13)               |
| <b>Refinement</b>                  |                         |
| Resolution (Å)                     | 50.0-2.61               |
| No. reflections                    | 83938                   |
| $R_{\text{work}}/ R_{\text{free}}$ | 20.7/25.8               |
| No. atoms                          |                         |
| Protein                            | 17464                   |
| Ligand/ion                         | 241                     |
| Water                              | 294                     |
| B-factors                          |                         |
| Protein                            | 44                      |
| Ligand/ion                         | 56                      |
| Water                              | 54                      |
| R.m.s deviations                   |                         |
| Bond lengths (Å)                   | 0.008                   |
| Bond angles (°)                    | 0.789                   |

868

\*Highest resolution shell is shown in parenthesis.

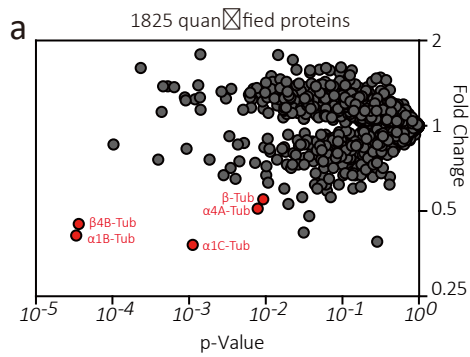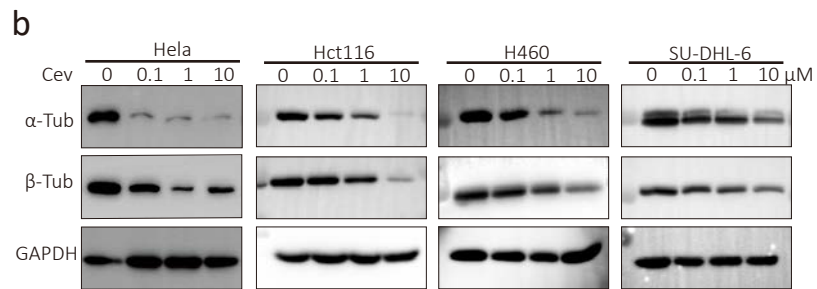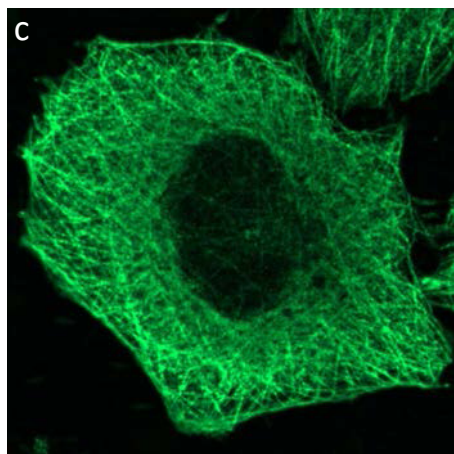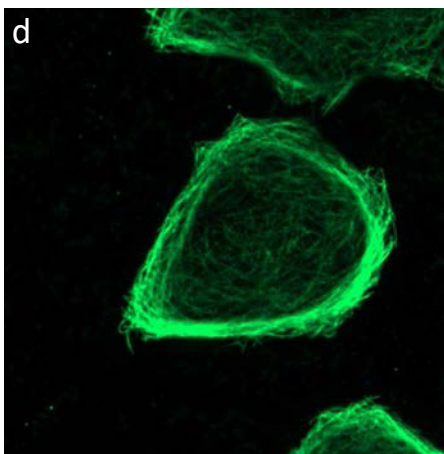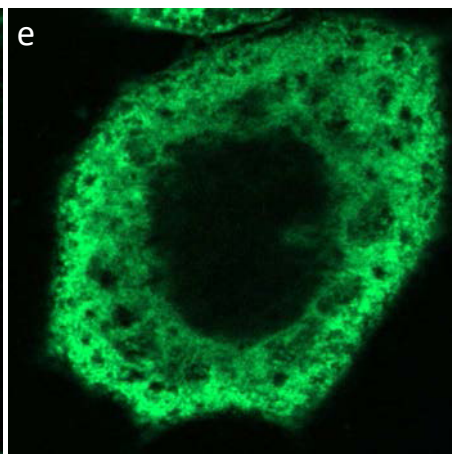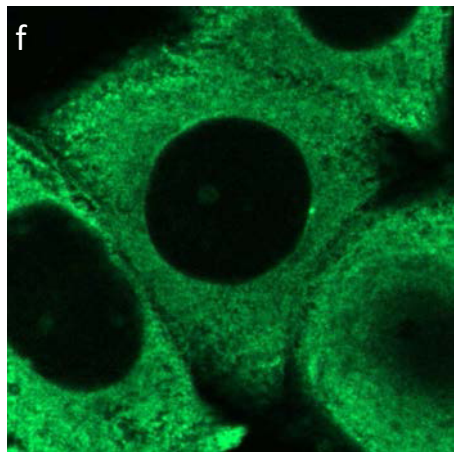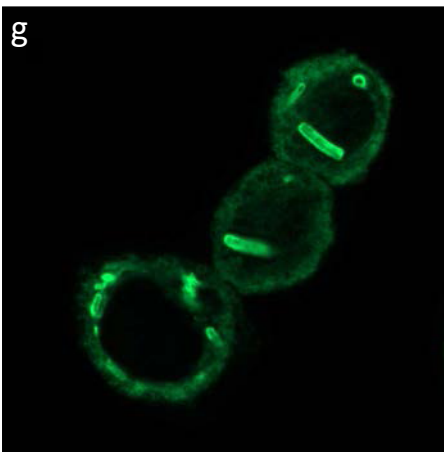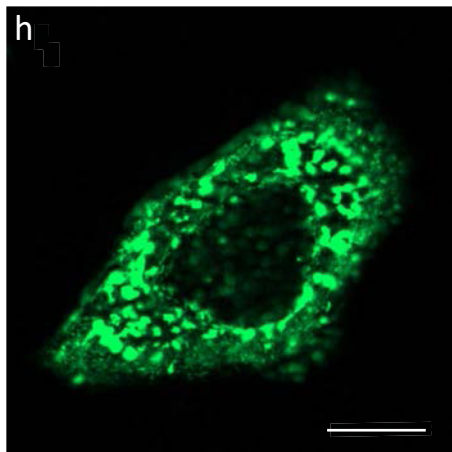



**a**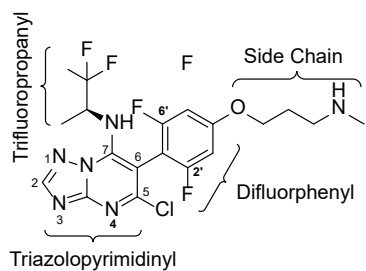**b**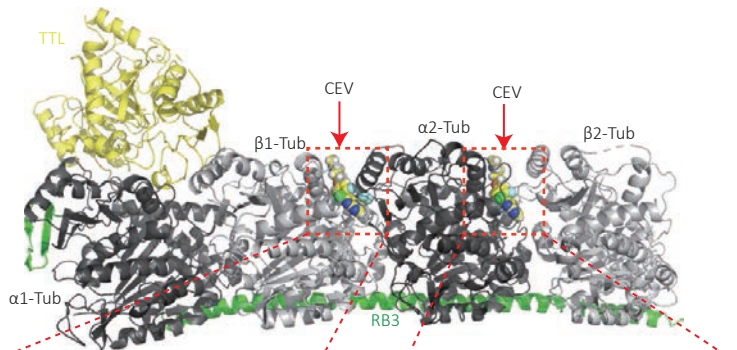**c**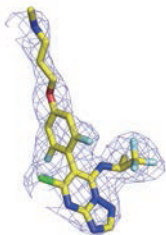**d**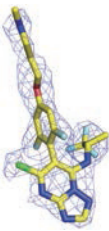**e**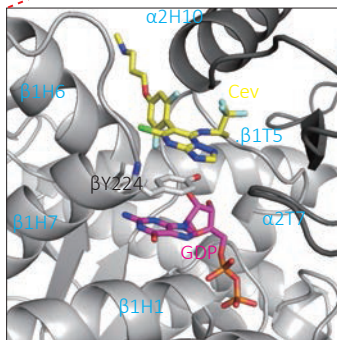**h**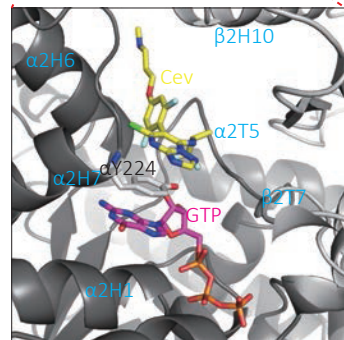**f**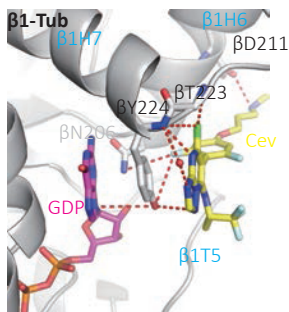**g**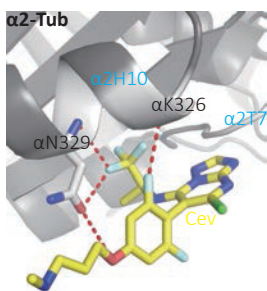**i**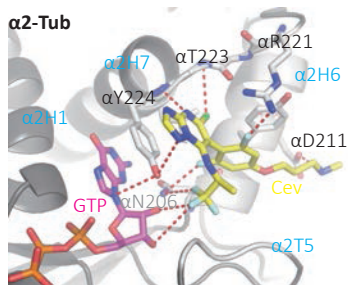

**a**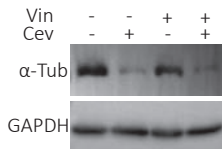**b**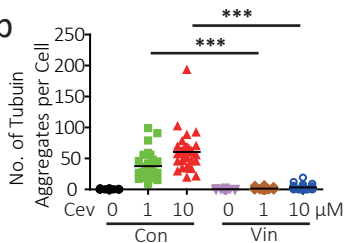**c**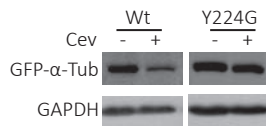**d**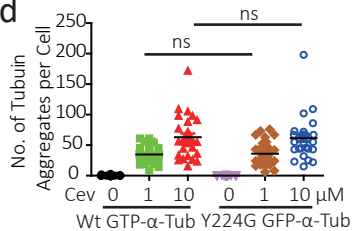**e**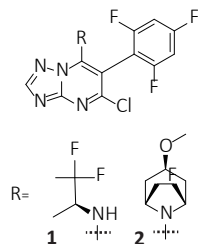**f**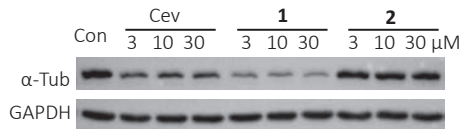**h**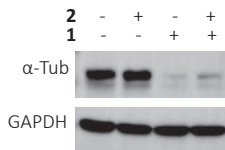**i**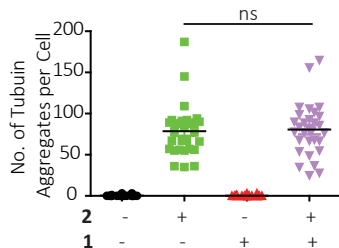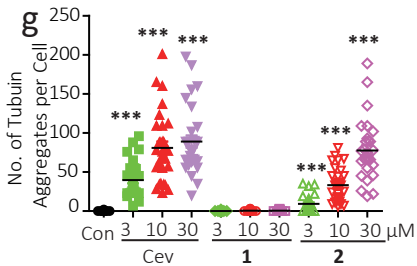

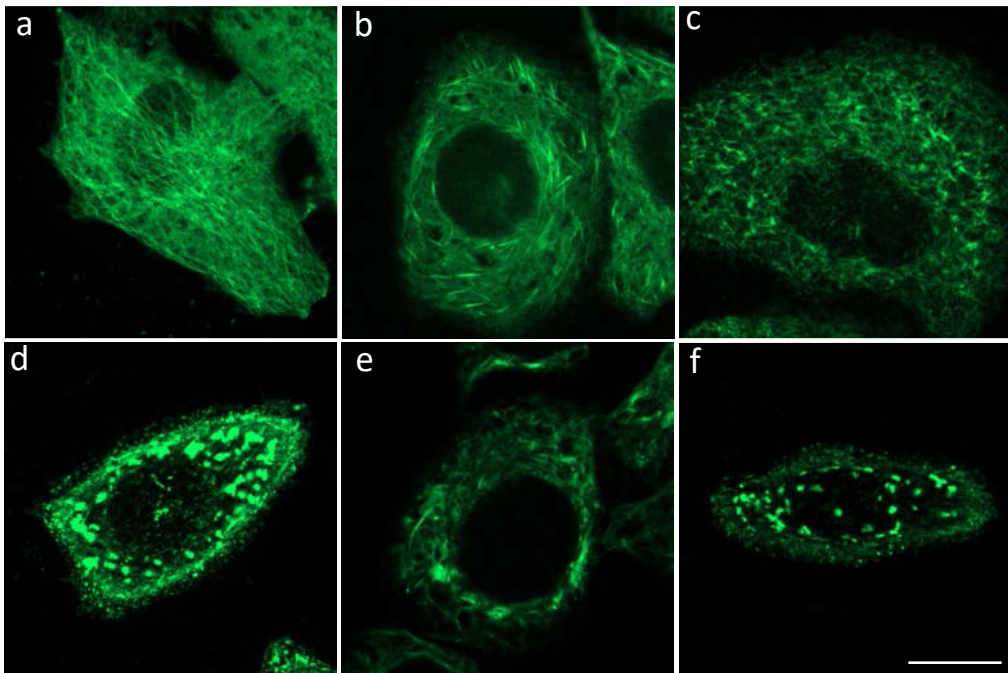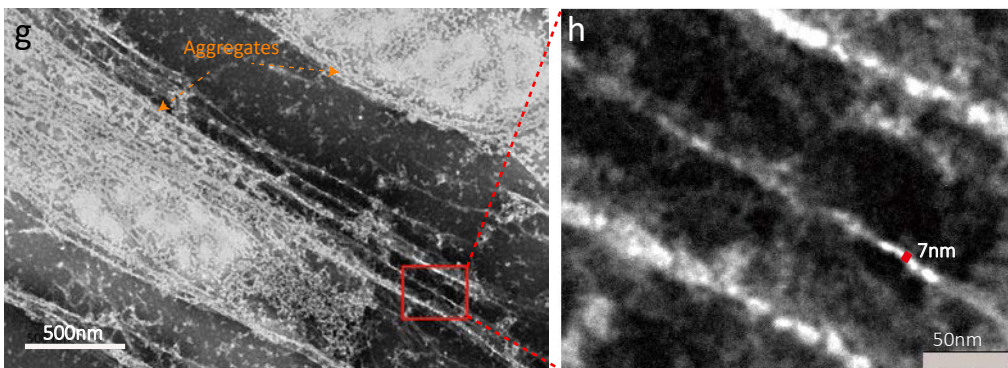

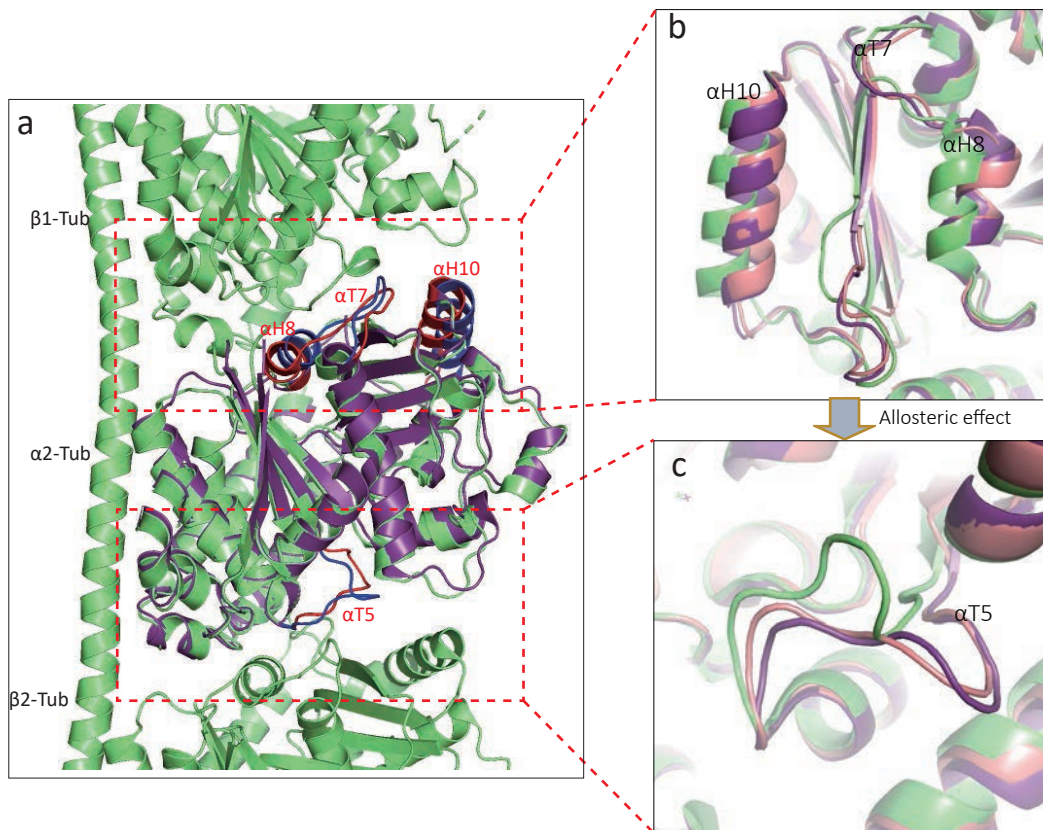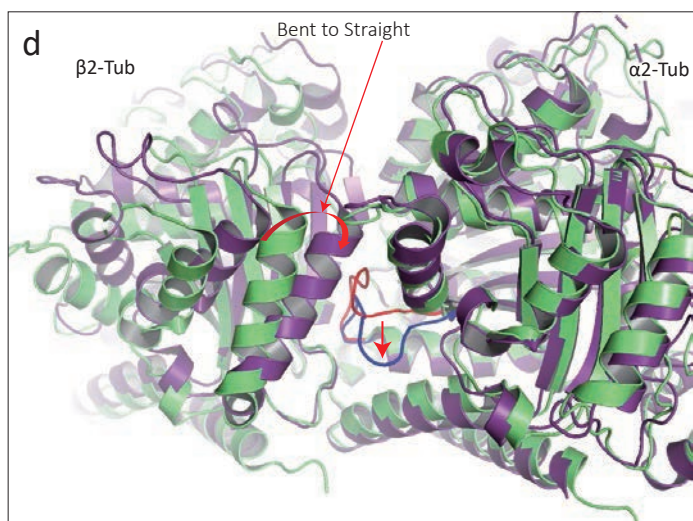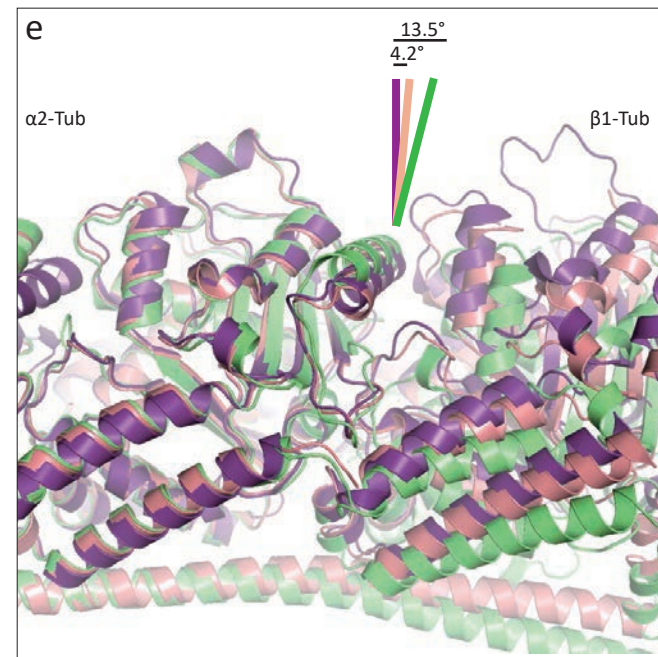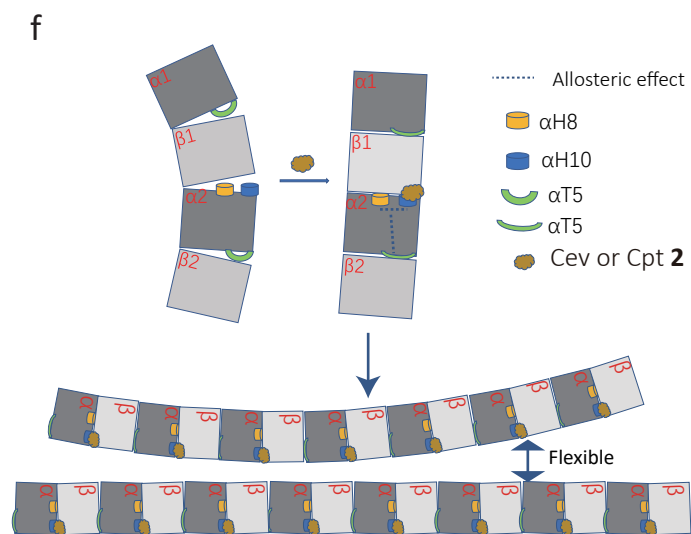

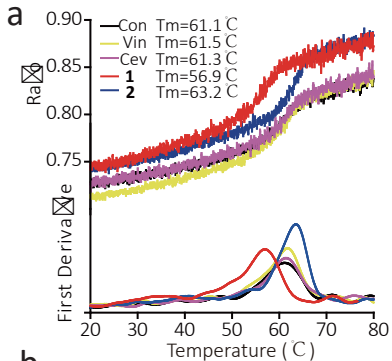

**b**

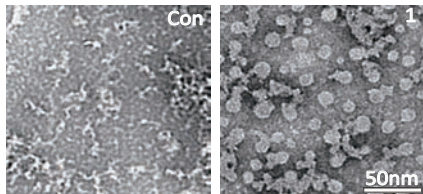

**c**

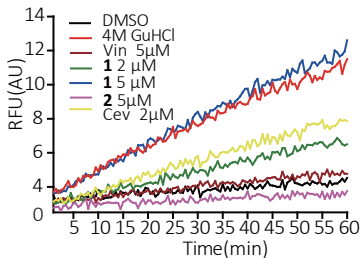

**d**

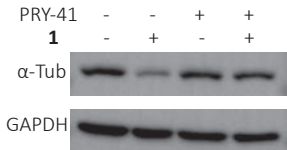

**a**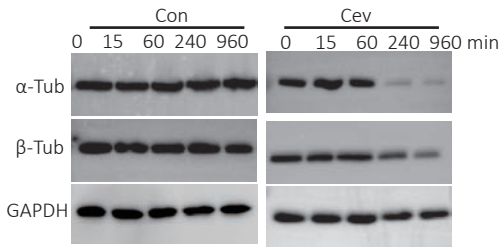**b**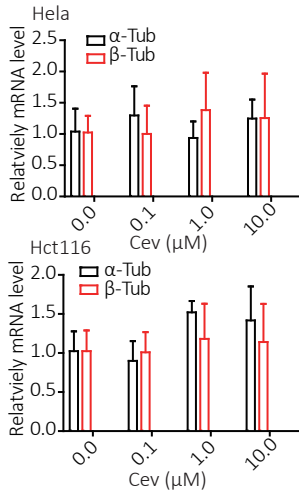**c**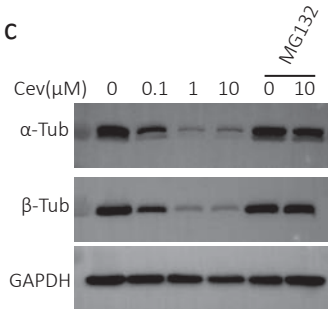

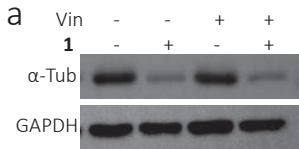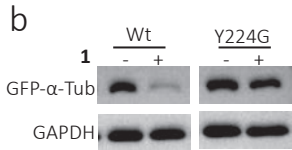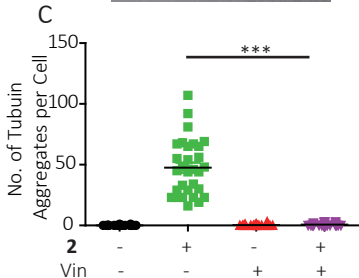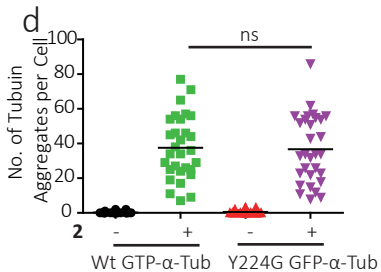

**a**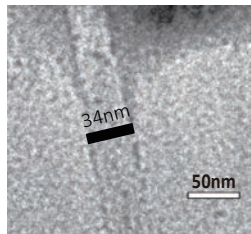**b**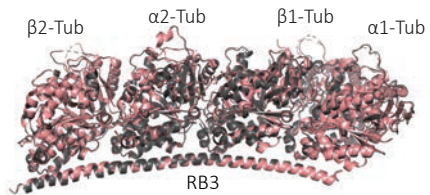**c**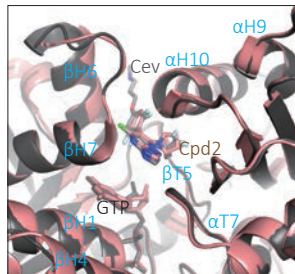**d**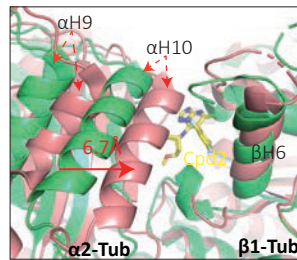**e**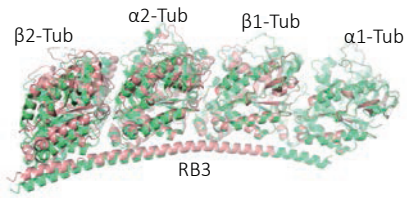**f**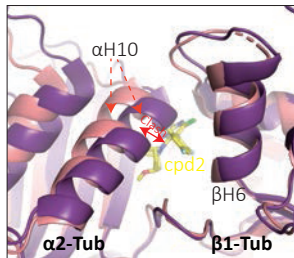**g**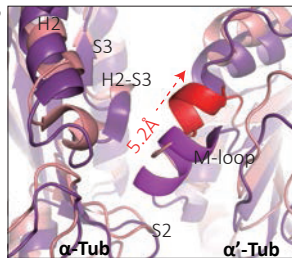**h**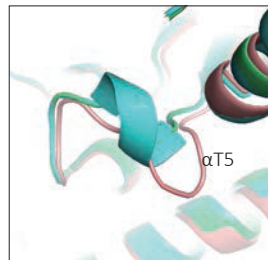

Source: http://biorxiv.org/content/10.1101/2020.09.11.293563v1.full.pdf
